1 **Manuscript type: TOOLS**

2  
3 **Detection and quantification of the vacuolar H<sup>+</sup>-ATPase using the**  
4 ***Legionella* effector protein SidK**

5  
6 Michelle E. Maxson<sup>1</sup>, Yazan M. Abbas<sup>2</sup>, Jing Ze Wu<sup>1,4</sup>, Sergio Grinstein<sup>1,4\*</sup> and John L.  
7 Rubinstein<sup>2,3,4</sup>

8  
9 <sup>1</sup> Program in Cell Biology, The Hospital for Sick Children, Toronto, ON M5G 0A4, Canada.

10 <sup>2</sup> Program in Molecular Medicine, The Hospital for Sick Children Research Institute, Toronto,  
11 ON M5G 0A4, Canada.

12 <sup>3</sup> Department of Medical Biophysics, University of Toronto, Toronto, ON M5G 1L7, Canada.

13 <sup>4</sup> Department of Biochemistry, University of Toronto, Toronto, ON M5S 1A8, Canada.

14

15

16

17 *Running title:* Detection of V-ATPases using SidK

18

19 *Key words:* V-ATPase, SidK, *Legionella*, fluorescence microscopy

20

21

22

23 \* Corresponding author: Sergio Grinstein, Program in Cell Biology, The Hospital for Sick

24 Children, 555 University Avenue, Toronto, Ontario, Canada M5G 1X8. Tel.: +1 416 813 5727;

25 Fax: +1 416 813 5727; E-mail: [sergio.grinstein@sickkids.ca](mailto:sergio.grinstein@sickkids.ca)

26 ABSTRACT

27 Acidification of secretory and endocytic organelles is required for proper receptor recycling,  
28 membrane traffic, protein degradation, and solute transport. Proton-pumping vacuolar ATPases  
29 (V-ATPases) are responsible for this luminal acidification, which increases progressively as  
30 secretory and endocytic vesicles mature. An increasing density of V-ATPase complexes is  
31 thought to account for the gradual decrease in pH, but available reagents have not been  
32 sufficiently sensitive nor specific to test this hypothesis. We introduce a new probe to localize  
33 and quantify V-ATPases in eukaryotic cells. The probe is derived from SidK, a *Legionella*  
34 *pneumophila* effector protein that binds to the V-ATPase A subunit. We generated plasmids  
35 encoding fluorescent chimeras of SidK<sub>1-278</sub>, and labeled recombinant SidK<sub>1-278</sub> with AlexaFluor-  
36 568 to visualize and quantify V-ATPases with high specificity in live and fixed cells, respectively.  
37 We show that V-ATPases are acquired progressively during phagosome maturation, that they  
38 distribute in discrete membrane subdomains, and that their density in lysosomes depends on  
39 the subcellular localization of the lysosome.

40

## 41 INTRODUCTION

42 The steady-state pH of individual cellular compartments is a key determinant of their  
43 function and must be regulated stringently. Indeed, the luminal pH directs receptor recycling and  
44 membrane traffic, regulates protein degradation, and contributes to the transmembrane  
45 protonmotive force that drives the transport of a variety of organic and inorganic solutes  
46 (Maxfield and McGraw, 2004; Saftig and Klumperman, 2009; Fisher and Scheller, 1988; Huotari  
47 and Helenius, 2011). It is therefore not surprising that dysregulation of organellar pH has been  
48 implicated in various human diseases such as cancer, neurological disorders, osteoporosis, and  
49 autoimmunity (Marshansky et al., 2014; Capecchi and Forgac, 2013; Colacurcio and Nixon,  
50 2016; Sun-Wada et al., 2006; Eaton et al., 2021).

51 Most endocytic and secretory organelles maintain an acidic lumen, with acidification  
52 increasing progressively as these organelles approach their terminal stages (Mellman et al.,  
53 1986). Thus, the endocytic pathway progresses from slightly acidic early endosomes (pH 6.5) to  
54 highly acidic lysosomes (pH 4 to 5). The main driver of organellar acidification is the  
55 ATP-dependent proton pump known as the vacuolar H<sup>+</sup>-ATPase (V-ATPase). The V-ATPase is  
56 present in vesicular membranes of the endocytic and secretory pathways, and is also found in  
57 the plasma membrane of specialized cell types involved in the active extrusion of cytosolic  
58 protons, such as osteoclasts and renal intercalated cells (Toei et al., 2010; Futai et al., 2019).  
59 The V-ATPase is a large rotary complex with 16 different subunits in mammals. ATP-hydrolysis  
60 occurs in the soluble catalytic V<sub>1</sub> region (subunits A to H), driving rotation of the enzyme's rotor  
61 subcomplex and proton translocation through the V<sub>0</sub> regions (subunits a, d, e, f c, c',  
62 ATP6AP1/Ac45, and ATP6AP2/PRR; Abbas et al., 2020). V-ATPase activity is regulated by  
63 several mechanisms, including reversible dissociation of the V<sub>1</sub> and V<sub>0</sub> regions (Tabke et al.,  
64 2014; Kawasaki-Nishi, 2001; Parra and Kane, 1998; Poëa-Guyon et al., 2013), phosphorylation  
65 (Voss et al., 2007; Alzamora et al., 2010), and changes in membrane lipid composition  
66 (Banerjee et al., 2019; Vasanthakumar et al., 2019; Uchida et al., 1985).

67 Several parameters determine the steady-state pH of the lumen of an organelle. Because  
68 proton pumping by V-ATPase is electrogenic, the rate of pumping can be limited by the  
69 permeability of the membrane to neutralizing counter ions. In addition, the accumulation of  
70 protons is opposed by ongoing proton backflux or “leak” via a collection of incompletely  
71 characterized channels and transporters. A final fundamental parameter is the density of V-  
72 ATPase complexes in the membrane of any particular organelle. It has been tacitly assumed  
73 that V-ATPase density increases progressively as the components of endocytic and secretory  
74 pathways mature and become more acidic. However, this assumption has not been validated  
75 for two main reasons. First, it is difficult to isolate individual stages of these pathways with  
76 sufficient purity for reliable biochemical analysis. Second, reagents with sufficient resolution and  
77 accuracy are lacking for localization and quantification of V-ATPase in cells. Several antibodies  
78 to different V-ATPase subunits are available commercially and some of them have yielded  
79 satisfactory results in histological analyses, especially of tissues like the kidney where  
80 specialized cell types are uniquely enriched in V-ATPases. However, these same antibodies  
81 show poor specificity and a low signal-to-noise ratio when used to stain non-specialized single  
82 cells, which have a lower abundance of V-ATPases. The interpretation of the resulting  
83 immunostaining can be ambiguous, confounding the results.

84 The paucity and unsatisfactory performance of reagents currently available to study the V-  
85 ATPase motivated us to develop a novel tool for its specific intracellular labeling in eukaryotic  
86 cells. To this end we took advantage of SidK, an effector protein deployed by *Legionella*  
87 *pneumophila* to inhibit the V-ATPase (Xu et al., 2010). SidK was recently shown to bind directly  
88 to yeast and mammalian V-ATPases by (Zhao et al., 2017; Abbas et al., 2020), allowing use of  
89 the effector to purify proton pumps from tissue extracts (Abbas et al., 2020). In this study, we  
90 describe the generation and labeling of a recombinant fragment of SidK and its use to localize  
91 and quantify V-ATPases in eukaryotic cells with high sensitivity and specificity. We utilized this  
92 reagent to study the distribution of the V-ATPase in various cell types, and to monitor its



93 acquisition by membrane-bound compartments as they mature along the endocytic pathway.

94 Lastly, we used SidK to estimate the number of V-ATPase complexes in individual

95 compartments as a function of their position within the cell.

96

97 RESULTS

## 98 **Generation of fluorescent SidK chimeras for expression in mammalian cells**

99 SidK was reported to bind with high affinity to the A subunit of the V-ATPase (Xu et al.,  
100 2010; Sharma and Wilkens, 2017; Abbas et al., 2020; Zhao et al., 2017). We reasoned that the  
101 *Legionella* effector would be an effective probe to visualize V-ATPase by fluorescence  
102 microscopy. To this end we generated chimeric constructs consisting of amino acids 1 to 278 of  
103 SidK (SidK<sub>1-278</sub>) attached to a fluorescent protein (GFP or mCherry) with a linker sequence.  
104 SidK<sub>1-278</sub> suffices to interact with the A subunit with high specificity; indeed, this fragment was  
105 used for the affinity purification of V-ATPases from cell and tissue extracts (Fig. 1A; see also  
106 Abbas et al., 2020). GFP or mCherry were linked to SidK<sub>1-278</sub> via its C terminus because the  
107 structure of the V-ATPase:SidK<sub>1-278</sub> complex suggested that attachment at this position was  
108 unlikely to affect association of the chimera with the V-ATPase (Fig. 1B; Abbas et al., 2020). For  
109 brevity, the resulting construct is referred to simply as SidK.

110 As is often the case, varying levels of expression were observed following transient  
111 transfection of fluorescent SidK in HeLa cells. The fluorescence intensity of the soluble (excess)  
112 SidK seen in high expressers (SidK<sub>high</sub>) precluded the resolution of the fraction of the construct  
113 bound to V-ATPase-containing organelles, such as lysosomes (Fig. 1C). In contrast, SidK  
114 showed clear association with vesicular and tubular structures in low-expressing cells (SidK<sub>low</sub>,  
115 Fig. 1D), some of which were identifiable as lysosomes by loading with fluorescent dextran.  
116 Because the excess fluorescence of SidK<sub>high</sub> cells appeared to be cytosolic, we predicted that  
117 selective removal of soluble material would reveal the more tightly-bound, organelle-associated  
118 probe. This assumption was tested by comparing SidK<sub>high</sub> cells before (Fig. 1E) and after (Fig.

119 1F) selective leaching of cytosolic components following permeabilization of the plasma  
120 membrane with the pore-forming toxin, pneumolysin (PLY). As anticipated, the cytosolic  
121 fluorescence was largely depleted in PLY-treated cells, revealing membrane-associated SidK, a  
122 fraction of which was clearly co-localized with LAMP1, a marker of late endosomes/lysosomes.  
123 We concluded that the fluorescent chimeras of SidK can be used for detection of membrane-  
124 associated ligands, presumably V-ATPases, particularly in cells with low expression level or  
125 permeabilized with PLY or similar reagents.

126

### 127 **Expression of SidK-fluorescent protein constructs affects lysosomal positioning and pH**

128 In otherwise untreated HeLa cells late endosomes/lysosomes are largely located near the  
129 nucleus, as revealed by LAMP1 immunostaining (Fig. 2A). However, we noted that  
130 endo/lysosomes tended to accumulate at the cell periphery of SidK-transfected cells, particularly  
131 those where the construct was highly expressed (Fig. 2B; see also 1F). Because SidK has been  
132 shown to inhibit the V-ATPase partially both *in vitro* and in mammalian cells (Zhao et al., 2017;  
133 Xu et al., 2010), we considered the possibility that inhibition of proton pumping was responsible  
134 for the altered distribution of LAMP1-positive compartments. This notion was validated by  
135 treating cells with concanamycin A, a potent and specific V-ATPase inhibitor, which resulted in a  
136 similar margination of a fraction of the LAMP1-positive compartments (Fig. 2C). These  
137 observations are consistent with previous reports that the positioning of lysosomes correlates  
138 with their luminal pH (Johnson et al., 2016).

139 To verify that SidK caused lysosomal alkalinization we used cresyl violet (Ostrowski et al.,  
140 2016), an acidotropic fluorescent dye that is more photostable than the LysoTracker dye used  
141 by Xu et al. (2010). Unexpectedly, and in apparent disagreement with the findings of Xu et al.  
142 (2010), the lysosomes remained acidic (retained cresyl violet) despite the presence of SidK in  
143 the cytosol (Fig. 2D). The reliability of cresyl violet as an indicator of lysosomal acidification was  
144 confirmed using concanamycin A, which prevented the accumulation of the acidotropic dye (Fig.

145 2E). It is noteworthy, however, that like other acidotropic dyes, cresyl violet is a coarse indicator  
146 of pH, unable to sense moderate changes in pH. In this regard, it is of interest that *in vitro*  
147 determinations using purified yeast V-ATPase showed that saturating concentrations of SidK  
148 caused only a  $\approx 30\%$  inhibition of ATPase activity (Zhao et al., 2017). To more precisely assess  
149 the effect of SidK expression on HeLa cells, their lysosomes were loaded with FITC-dextran and  
150 pH was measured ratiometrically *in situ* (see Materials and Methods). Using this approach, the  
151 pH of lysosomes in SidK-expressing cells was found to be moderately –yet significantly– more  
152 alkaline (pH  $5.22 \pm 0.12$ ) than that of control cells (pH  $4.97 \pm 0.07$ ; Fig. 2F). As discussed  
153 above, a variety of parameters influence the steady-state luminal pH of an organelle. Therefore,  
154 we endeavored to more directly assess the effect of SidK on proton pumping by the V-ATPase.  
155 This activity can be measured by quantifying the effect of concanamycin on proton flux across  
156 the lysosomal membrane. These measurements are based on the assumption that at steady-  
157 state pH, V-ATPase activity is precisely offset by an equivalent but opposite backflux (leak) of  
158 protons. The initial rate of proton leakage unmasked by addition of saturating concentrations of  
159 concanamycin can therefore be considered as an accurate measure of proton pumping by the  
160 V-ATPase at steady-state. This analysis (Fig. 2G) indicated that SidK reduced proton pumping  
161 by the V-ATPase by 29%, in good agreement with previous *in vitro* measurements (Zhao et al.,  
162 2017). Whether the modest change in pH or the more obvious inhibition of the rate of pumping  
163 are responsible for the redistribution of lysosomes within the cells remains to be established.

164

### 165 **Localization of the V-ATPase in mammalian cells using SidK-AL568**

166 The preceding results indicated that, while capable of detecting the V-ATPase under  
167 appropriate conditions, expression of a genetically-encoded form of fluorescent SidK had  
168 obvious limitations, most notably the fact that chronic inhibition of the pump –even if only  
169 partial– alters the distribution of the labeled organelles. To avoid inhibition of the pump prior to  
170 its detection we developed an alternative probe based on SidK that could be used to label the

171 V-ATPase in fixed and permeabilized cells. Recombinant SidK<sub>1-278</sub> was expressed in bacteria  
172 and, after purification to near homogeneity (Fig. 1A), was covalently labeled with Alexa Fluor  
173 568 (referred to hereafter as SidK-AL568) and used to stain cells. In HeLa cells, SidK-AL568  
174 labelled vesicular and cisternal compartments reminiscent of endosomes and the Golgi complex  
175 with remarkably little background noise (Fig. 3A, left panel). This staining was blocked by  
176 pretreatment with unlabeled SidK (Fig. 3A, right panel), implying that binding is saturable and  
177 that Alexa Fluor conjugation did not alter the binding properties of SidK.

178 The specificity of SidK-AL568 for the A subunit of the V-ATPase was validated by comparing  
179 staining of wild-type *Saccharomyces cerevisiae* to that of a mutant strain lacking the gene for  
180 subunit A (*vma1*Δ). SidK-AL568 clearly labeled the vacuole and pre-vacuolar compartment of  
181 wild-type spheroplasts, but staining was absent in the *vma1*Δ strain. Additional evidence that  
182 SidK-AL568 associates with assembled V-ATPase complexes in mammalian cells was obtained  
183 by ectopic (over)expression in HeLa cells with fluorescently tagged V<sub>o</sub>a2 or V<sub>o</sub>a3 subunits that  
184 localize predominantly to the Golgi complex or endosomes, respectively (Saw et al., 2011).  
185 SidK-AL568 co-localized with both V<sub>o</sub>a2- and V<sub>o</sub>a3-GFP, with highly significant Manders'  
186 coefficients (M= 0.74 and 0.79, respectively; Figs. 3C and D). Taken together, these data  
187 verified that fluorescently labeled SidK is a sensitive tool for the specific detection of the V-  
188 ATPase in eukaryotic cells, where it detects primarily organelle-associated complexes.

189 We proceeded to use SidK-AL568 to assess the presence and density of V-ATPase  
190 complexes in defined intracellular compartments, an experiment that –while conceptually  
191 simple– has been hampered by the paucity of sufficiently sensitive reagents. As intimated above  
192 and illustrated in more detail in Fig. 4A, SidK-AL568 stained peripheral vesicular compartments  
193 (Fig. 4A, open arrowheads) as well as juxtannuclear vesicles and cisternae (closed arrowheads)  
194 likely corresponding to endocytic and Golgi components, respectively. These assumptions were  
195 confirmed by simultaneously visualizing LAMP1 and the *trans*-Golgi (Figs. 4B and C),  
196 demonstrating that SidK-AL568 staining has a high degree of colocalization with these

197 compartments, which are known to have a markedly acidic lumen (Casey et al., 2009). In  
198 contrast, SidK-AL568 showed minimal colocalization with markers of the endoplasmic reticulum  
199 (ER) and mitochondria (Figs. 4E and F), which have a near-neutral or slightly alkaline lumen  
200 (Casey et al., 2009). Of note, SidK-AL568 labeled poorly the *cis*-Golgi (Fig. 4D), which is  
201 thought to be less acidic than the *mid*- and *trans*-cisternae.

202 Based on the previous observations, we believe that SidK-AL568 is an excellent probe to  
203 detect V-ATPase, possibly superior to other reagents commonly used in the literature. Indeed,  
204 when compared to a commercially available antibody raised against the same subunit to which  
205 SidK-AL568 binds (V-ATPase subunit A), our probe yielded better results. The antibody chosen  
206 for comparison ( $\alpha$ -ATP6V1A) is widely used in the literature to document the localization of V-  
207 ATPases, often as the basis to reach important functional conclusions (e.g. Ramirez et al.,  
208 2019). When tested in HeLa cells (Figs. 4G and H), this antibody yielded a diffuse punctate  
209 pattern reminiscent of that reported by Ramirez et al. (2019) for tumour cells and elsewhere for  
210 a variety of other cells stained with other A subunit antibodies (Yajima et al., 2007; McGuire et  
211 al., 2019; Michel et al., 2013). However, its co-localization with acidic compartments was poor:  
212 the Manders' coefficient of the antibody with LAMP1 was  $M = 0.08$  (compared to an  $M = 0.79$   
213 with SidK-AL568), while that with anti-TGN46, the *trans*-Golgi marker used, was  $M = 0.05$   
214 (compared to an  $M = 0.81$  with SidK-AL568). Comparison of the  $\alpha$ -ATP6V1A signal with that of  
215 SidK-AL568 showed that most of the  $\alpha$ -ATP6V1A staining was background, which was removed  
216 by applying the unbiased Costes thresholding method prior to colocalization analysis (Costes et  
217 al., 2004); see Materials and Methods); this was not the case for SidK-AL568 staining (Fig. S1).  
218 We therefore suggest that SidK-AL568 is a more specific, preferable probe.

219

220 **Assessment of V-ATPase acquisition by maturing phagosomes**

221 The phagosomes formed by cells of the innate immune system, such as macrophages, are  
222 specialized compartments with microbicidal and degradative functions. The lumen of nascent  
223 phagosomes is near-neutral, but becomes gradually acidic as the compartment matures,  
224 reaching a pH  $\leq$  5 (e.g. Fig. 5A). This acidification has been demonstrated to depend on the  
225 activity of V-ATPases (Lukacs et al., 1990), which are nevertheless undetectable on the  
226 macrophage plasma membrane that forms the initial phagosomal enclosure. The graded  
227 acidification is thought to result from accumulation of V-ATPases complexes owing to fusion of  
228 the nascent phagosome with early and late endosomes and, ultimately, with lysosomes.  
229 Remarkably, to our knowledge, this purported mechanism has not been documented  
230 experimentally. We therefore utilized the SidK-AL568 probe to detect V-ATPases during the  
231 phagosomal maturation process, using murine macrophages (RAW264.7 cells) that had been  
232 transfected with various membrane markers correlated to maturation state (Fig. 5B).

233 Like HeLa cells, resting RAW264.7 macrophages showed distinct vesicular staining with  
234 SidK-AL568, as well as larger vacuoles that likely form by macropinocytosis, which is  
235 constitutively active in these cells (Fig. 5C). Nascent phagosomes, enriched by arresting  
236 phagocytosis shortly (2 min) after exposure to the target particles, were identified by the  
237 persistence of plasmalemmal markers (e.g. PM-GFP). As expected, these nascent phagosomes  
238 were essentially devoid of V-ATPases, although V-ATPase-rich organelles seemed to  
239 accumulate in their immediate vicinity (Fig. 5D). In contrast, early phagosomes –which are  
240 measurably acidic and were identified by the acquisition of Rab5 and PtdIns(3)P– showed  
241 distinct acquisition of SidK-AL568 into discrete areas (Fig. 5E and F). Late  
242 phagosomes/phagolysosomes, which were identified by possessing Rab7 or LAMP1, were even  
243 more enriched with SidK-AL568 (Fig. 5G and H), consistent with their highly acidic pH.  
244 Interestingly, a patchy localization of SidK-AL568 was noted at all stages of phagosome  
245 maturation, suggesting that the recruitment of V-ATPases may occur at restricted sites, which  
246 may have important implications for traffic and pH regulation.

247

248 **The V-ATPase is heterogeneously distributed on the membrane of acidic organelles**

249 The discontinuous pattern of SidK-AL568 on the late-phagosome membrane is reminiscent  
250 of the spatial segregation of other membrane components that was observed previously and  
251 associated with the formation of ER-phagosome contacts (Levin-Konigsberg et al., 2019).  
252 These contacts are established, at least partly, by interaction of phagosomal ORP1L with the  
253 ER resident proteins VapA and VapB (Rocha et al., 2009; Loewen and Levine, 2005). We  
254 considered the possibility that the SidK-AL568 patches represented similar regions of V-ATPase  
255 exclusion from ER contact sites. To assess this possibility, phagosomes of RAW264.7 cells that  
256 had been transfected with ORP1L-GFP were stained with SidK-AL568. Following transfection  
257 (Fig. 6A), ORP1L and the V-ATPase showed an inverse distribution, the latter accumulating in  
258 regions where the former was depleted. This segregation could be quantified and is represented  
259 as a ratio of SidK-568:ORP1L fluorescence in the rightmost panel of Fig. 6A. In contrast, SidK-  
260 AL568 co-distributed with Arl8b (Fig. 6B), which was shown earlier to be excluded from ER  
261 contact sites (Levin-Konigsberg et al., 2019). It was imperative to ensure that the apparent  
262 depletion of V-ATPases from contact areas was not caused by limited access of SidK-AL568.  
263 Accessibility was verified by immunostaining VapB alongside SidK-AL568 (Fig. 6C). As was the  
264 case for ORP1L, the regions that were rich in VapB were comparatively depleted of SidK-  
265 AL568. Because the antibody used to immunostain VapB is much larger ( $\approx 150$  kDa) than SidK-  
266 AL568 ( $\approx 35$  kDa), exclusion of the V-ATPase ligand cannot account for the observed  
267 segregation, which is an indication of the genuine existence of V-ATPase-enriched  
268 microdomains.

269 The realization that unappreciated microdomains rich in V-ATPases exist in phagosomes  
270 prompted us to ask whether similar subdomains exist in other organelles. To facilitate  
271 visualization, we initially generated enlarged lysosomes using sucrose (Cohn and Ehrenreich,  
272 1969; Bright et al., 1997; DeCourcy and Storrie, 1991; Swanson et al., 1986; Ferris et al., 1987)



273 in cells that had been transfected with ORPL1 (Fig. 7A) or Arl8b (Fig. 7B). As with late  
274 phagosomes, V-ATPase (SidK-AL568) was depleted from membrane domains where ORPL1  
275 was found, while coinciding with Arl8b.

276 In addition to visualizing V-ATPase microdomains in enlarged phagosome or sucrose-  
277 enlarged lysosomes, the existence of comparatively long tubular lysosomes in macrophages  
278 also enabled us to assess segregation in resting, unmodified cells. In RAW264.7 macrophages  
279 (Fig. 7C) and human monocyte-derived macrophages (Fig. 7D), regions of late  
280 endosome/lysosomes –identified by LAMP1– were preferentially enriched with V-ATPase. This  
281 pattern could also be observed in some HeLa cells where the LAMP1-positive structures were  
282 sufficiently large (Fig. 7E). In all cases, regions of V-ATPase exclusion from LAMP1-stained  
283 areas were observed; in some instances SidK-AL568- stained structures appeared to bud off  
284 from LAMP-positive tubular lysosomes. The observed segregation may be an indication of  
285 selective delivery or removal of V-ATPases at varying stages of organellar maturation.

286

### 287 **Quantification of the number of V-ATPases per lysosome: evidence of heterogeneous** 288 **density that correlates with the subcellular localization of the organelles**

289 To date, estimates of the number of V-ATPase complexes in vesicular compartments  
290 have been global approximations based on measurements made in pooled whole-cell  
291 preparations (de Araujo et al., 2020; Takamori et al., 2006). In an effort to refine estimates and  
292 provide topological information, we attempted to quantify the number of SidK-AL568 molecules  
293 bound per organelle. This analysis required determination of the fraction of SidK molecules  
294 labeled by the Alexa dye and the number of fluorophores attached per SidK-AL568 molecule,  
295 followed by comparison of the single molecule fluorescence to the total fluorescence associated  
296 with the organelle of interest. We determined that 96.7% of the molecules were labeled and  
297 analysis of the photobleaching pattern of monodisperse SidK (Fig. 8A; see Materials and  
298 Methods) indicated that 99% of these molecules had reacted with a single fluorophore (Fig. 8B).



299 We next determined the concentration of SidK-AL568 needed to saturate all the available  
300 binding sites on lysosomes (Fig. 8C). With these parameters and conditions, the total  
301 fluorescence associated with individual lysosomes was converted to a corresponding number of  
302 V-ATPases, with the assumption that all three A subunits of every V-ATPase are accessible for  
303 SidK-AL568 binding. In HeLa cells, where individual lysosomes can be delineated more readily  
304 than in macrophages, the number of SidK-AL568 molecules associated per lysosome varied  
305 (Fig. 8D), with an average of  $4.42 \pm 0.03$  (mean  $\pm$  SEM) SidK molecules per lysosome,  
306 equivalent to 1.47 V-ATPase complexes per lysosome.

307 Previous research had shown that lysosomes are heterogeneous within a cell (Bright et al.,  
308 1997, 2016; Butor et al., 1995; Cheng et al., 2018). Additionally, lysosomal pH can vary with  
309 vesicle positioning, with peripheral lysosomes generally being more alkaline, and lysosomes  
310 near the center of the cell being more acidic (Johnson et al., 2016; Webb et al., 2021). A simple  
311 explanation for this finding could be that peripheral lysosomes have fewer V-ATPase complexes  
312 than central lysosomes, although other mechanisms could also cause this effect (see  
313 Introduction). To explore this phenomenon experimentally, lysosomes of HeLa cells were  
314 identified with LAMP1 as a marker and their V-ATPase density quantified with SidK-AL568. The  
315 resultant labeling with SidK-AL568 was more intense in juxtannuclear lysosomes than in more  
316 peripheral lysosomes (Fig. 8E). This differential distribution was quantified and is represented  
317 as a ratio of SidK-AL568:LAMP1 fluorescence (Fig. 8F). To more precisely assess whether the  
318 number of V-ATPases per lysosome varies as a function of their subcellular localization, the  
319 SidK-AL568 fluorescence of individual LAMP1-positive structures was analyzed relative to their  
320 distance from the edge of the cell. Cell outlines were drawn and degraded inward by 4  $\mu$ m  
321 iteratively, to create concentric shells within each cell (Fig. 8G). Comparison of these  
322 subgrouped LAMP1-positive vesicles confirmed the existence of a gradient of SidK-AL568 that  
323 correlates with the distance of the lysosomes from the cell center. The most juxtannuclear  
324 lysosomes bind approximately twice as many SidK-AL568 molecules as peripheral ones (Fig.

325 8H). This change in V-ATPase density corresponded to 2.1 V-ATPase complexes per lysosome  
326 at >16  $\mu\text{m}$  from the cell edge, compared to 1.1 lysosomal V-ATPases per lysosome for  
327 lysosomes 0 to 4  $\mu\text{m}$  from the cell edge. Interestingly,  $\approx 18\%$  of the lysosomes closest to the  
328 nucleus showed more than the average number of V-ATPase complexes (2 to 6 per lysosome).  
329 We conclude that the pH heterogeneity of lysosomes within individual cells can be explained, at  
330 least in part, by differences in their V-ATPase density.

331

## 332 DISCUSSION

333 Despite its clear importance in the maintenance of organellar pH and tissue homeostasis,  
334 the study of V-ATPases has been hampered by the lack of reagents to accurately localize and  
335 quantify these complexes. To address this problem, we developed a detection tool based on  
336 SidK, a *L. pneumophila* effector protein. SidK was an attractive detection tool for several  
337 reasons. First, it was reported to bind to the V-ATPase A subunit with high specificity (Abbas et  
338 al., 2020; Zhao et al., 2017; Xu et al., 2010) and affinity; SidK binds to the V-ATPase with a  $K_d \approx$   
339 3.5 nM (Sharma and Wilkens, 2017), which is comparable to the affinity of many  
340 immunoglobulins for their cognate antigens. Second, because the primary sequence of the V-  
341 ATPase A subunit is highly conserved across Eukarya, a SidK-based reagent should be  
342 applicable to a variety of model organisms. Indeed, we found SidK to interact equally with yeast  
343 and mammalian cells. Finally, unlike other V-ATPase subunits, the A subunit exists as a single  
344 isoform, so that the SidK reagent would be expected to bind V-ATPase wherever present in  
345 organelles, cells, and tissues.

346 We first expressed the V-ATPase-binding region of SidK (amino acids 1 to 278) as a fusion  
347 with GFP or mCherry. At modest expression levels, this construct enabled the detection of V-  
348 ATPase-rich membranes. However, at higher expression levels the unbound (cytosolic) probe  
349 obscured the intracellular organelles. This problem could be mitigated by leaching the cytosolic  
350 excess out the cells by permeabilizing the plasmalemma with PLY, revealing the specifically-

351 bound constructs. However, when expressing SidK, a process that requires hours, we observed  
352 a change in lysosomal positioning that we attributed to its inhibitory effect, as it mimicked the  
353 effects of concanamycin A. Accordingly, we measured a  $\approx$  30% inhibition of the proton-pumping  
354 rate in cells expressing SidK-mCherry. While our findings were not unexpected considering the  
355 observations made earlier *in vitro* and in cells (Abbas et al., 2020; Zhao et al., 2017; Xu et al.,  
356 2010; Johnson et al., 2016), they nonetheless underscored a limitation inherent to the use of  
357 ectopically expressed SidK. Indeed, inhibition of V-ATPase and the resultant changes in luminal  
358 pH can affect not only lysosome localization, but also the ability of the V-ATPase to interact with  
359 other molecules (Maranda et al., 2001; Hurtado-Lorenzo et al., 2006; Hosokawa et al., 2013),  
360 altering intracellular signaling (Balgi et al., 2011; Hu et al., 2016). In this context, it is noteworthy  
361 that SidK-GFP/mCherry did not properly label acidic portions of the Golgi complex. This lack of  
362 labeling could have resulted from obstruction caused by other molecules that associate with V-  
363 ATPase in the Golgi, but not with those of the endocytic compartment.

364 To circumvent the problems associated with SidK expression, we utilized fluorescently-  
365 conjugated recombinant SidK as an overlay staining reagent, followed by washing to remove  
366 unbound probe. SidK-AL568 localized to punctate and cisternal structures in mammalian cells,  
367 with little nonspecific background. The high signal-to-noise ratio, along with specific organellar  
368 markers allowed us to clearly discern V-ATPase-positive organelles, primarily endo/lysosomes  
369 and the *trans*-Golgi. This labeling was in sharp contrast to the staining we obtained using a  
370 commercially available antibody to the A subunit and the conditions for its use described in the  
371 literature (Ramirez et al., 2019), which yielded results similar to those reported by others using  
372 other available antibodies (Yajima et al., 2007; McGuire et al., 2019; Michel et al., 2013). V-  
373 ATPase complexes have been shown to interact with several accessory proteins involved in  
374 endocytic sorting and signaling (Merkulova et al., 2015; Maxson and Grinstein, 2014;  
375 Marshansky et al., 2014). These interacting proteins include sorting nexins SNX27, SNX10 and  
376 SNX11 (Merkulova et al., 2015; Chen et al., 2012; Xu et al., 2020), and the Regulator complex,

377 which controls mTOR activation during nutrient sensing (Zoncu et al., 2011). Additionally, the V-  
378 ATPase is hypothesized to function as a sensor of luminal pH, that regulates endocytosis  
379 through a pH-dependent interaction with ARNO, the guanine nucleotide exchange factor for Arf6  
380 (Hosokawa et al., 2013; Maranda et al., 2001; Hurtado-Lorenzo et al., 2006). Recently, some  
381 members of TLDC protein family have been found to interact with V-ATPase domains and  
382 modulate V-ATPase activity or stability (Merkulova et al., 2015; Castroflorio et al., 2021). These  
383 reports have relied on immunoprecipitation with available V-ATPase antibodies to study  
384 interactions. However, use of the more specific SidK-AL568 probe could provide more sensitive  
385 and/or specific measurements of interactions, as well as the ability to visualize novel  
386 interactions by high-resolution microscopy. Of interest, the 34.6 kDa SidK<sub>1-278</sub> fragment we used  
387 is considerably smaller than conventional primary antibodies (IgG ≈150 kDa), which are often  
388 used in combination with an equally large secondary antibody. Our smaller probe is better  
389 suited to access V-ATPases, and could therefore be advantageous for immunogold-labeling for  
390 transmission electron microscopy, where the penetrance of bulky antibodies can limit detection.  
391 The smaller size of SidK-AL568 compared to SidK-GFP/mCherry may also explain why the  
392 former is better able to detect V-ATPase in the Golgi complex, although fixation and  
393 permeabilization may have also facilitated its access.

394 The successful labeling of the acidic intracellular compartments emboldened us to utilize  
395 the probe to monitor the dynamics of recruitment of the V-ATPase to a specialized vesicular  
396 compartment, the phagosome. The progressive development of phagosomal acidification is well  
397 established and was assumed, yet not proven, to be associated with increasing V-ATPase  
398 density. We found that while the nascent phagosome is virtually devoid of V-ATPases, the  
399 presence of the complex becomes evident in early (Rab5- and PtdIns(3)P-positive)  
400 phagosomes, and their number increases further as they attain the phagolysosomal stage.  
401 Therefore, the increasing acidity during maturation can be attributed, at least in part, to an  
402 increase in V-ATPase density. This increase in density correlates well with the recent finding

403 that acidification of phagosomes to a pH < 6 during the transition between early and late  
404 phagosome results in the dissociation of Vps34 class III phosphatidylinositol-3-kinase from  
405 these organelles (Naufer et al., 2018). Therefore, V-ATPase recruitment to the phagosome  
406 would be expected to control the cessation of PtdIns(3)P synthesis on these compartments,  
407 which is necessary for transition to the late phagosome/phagolysosome stage (Vieira et al.,  
408 2001; Naufer et al., 2018).

409 We also observed that V-ATPase was not homogeneously localized throughout the  
410 membrane of the phagosome, and similar observations were made in enlarged and normal  
411 lysosomes. The existence of specialized subdomains was recently reported in phagosomes,  
412 where it was associated with the formation of contacts with the ER and the extension of tubular  
413 structures (Levin-Konigsberg et al., 2019). In the endocytic system, similar microdomains have  
414 been postulated to play roles in cargo sorting and receptor recycling through tubulation  
415 (Wijdeven et al., 2016; Rocha et al., 2009), and are likely also involved in phagosome  
416 resolution. Once internalized material has been degraded by acidic hydrolases, essential  
417 phagosomal and lysosomal membrane proteins must be parsed and redistributed within the cell  
418 for reutilization. The reformation of the lysosomal compartment by membrane-retrieval following  
419 content condensation was predicted long ago (Bright et al., 1997, 2016; Mullock et al., 1998),  
420 but the fate of specific components has not been well documented. In the case of the V-  
421 ATPase, retrieval from maturing phagosomes was demonstrated in *Dictyostelium discoideum*  
422 (Clarke et al., 2010), but to our knowledge has not been studied in mammalian cells. The  
423 observed V-ATPase-rich domains may be a precursor to the formation of recycling vesicles or  
424 tubules. In this regard, pH gradients have been recently observed in tubules formed by  
425 macrophages (Suresh et al., 2020; Naufer et al., 2018). Taken together, these findings suggest  
426 that proton-pumping microdomains may form on acidic organelles during the tubulation and  
427 fission that accompany resolution.

428 The high signal-to-noise ratio provided by the SidK-AL568 probe and its defined labeling  
429 stoichiometry enabled us to quantify the number of V-ATPase complexes per organelle.  
430 Quantification relied on the use of saturating concentrations of the probe, a requirement that  
431 was fulfilled by analyzing the concentration dependence of SidK-AL568 binding. We calculated  
432 the number of V-ATPases per lysosome to range between 1 and 6, averaging  $\approx 1.5$ . This  
433 number is similar to estimates for synaptic vesicles, with one V-ATPase per vesicle (Takamori et  
434 al., 2006). The paucity of pumps per organelle likely accounts for the difficulty encountered in  
435 their detection and highlights the need for highly-specific probes. It is important to emphasize  
436 that our estimates for the number of V-ATPases rely on the assumption that all three A subunits  
437 of every pump are accessible to the probe. Because an increasing number of proteins are  
438 appreciated to bind to the V-ATPase, steric hindrance may curtail the number of available  
439 subunits, which would result in an underestimate of the number of pumps. Through these  
440 experiments, we noted that the distribution of V-ATPases in association with LAMP1-positive  
441 structures was not homogeneous throughout the cell: more SidK-AL568 bound to juxtannuclear  
442 lysosomes, when compared to peripheral lysosomes. Shell analysis showed that the density of  
443 SidK-AL568 increased with distance from the cell edge, with the most central lysosomes  
444 containing up to 6 V-ATPases. These data are in line with recent reports showing that  
445 juxtannuclear lysosomes are, on average, more acidic than the more peripheral ones (Johnson et  
446 al., 2016; Webb et al., 2021).

447 While bearing in mind the caveats raised above regarding the assumption of unimpeded  
448 access to all the A subunits, our estimates can be used to calculate the rate of pumping of  
449 individual lysosomal V-ATPases *in situ*. Experiments like those in Fig. 2H indicated that addition  
450 of concanamycin alkalinized the lysosomes at an initial rate of  $0.198 \pm 0.1 \text{ pH}\cdot\text{min}^{-1}$ . Because at  
451 steady state the activity of the pumps must have matched the proton leak unmasked by  
452 concanamycin, the measured rate can be used to estimate pump activity. Considering the  
453 buffering power of the lysosomes, which we estimated to be  $23.5 \text{ mM}\cdot\text{pH}^{-1}$  –measured by

454 pulsing with ammonium— we calculate a proton flux per lysosome volume of  $9.50 \times 10^{-2}$   
455  $\text{mmol} \cdot \text{min}^{-1} \cdot \text{L}^{-1}$ . Assuming an approximate lysosomal volume of  $2 \times 10^{-17} \cdot \text{L}^{-1}$  (de Araujo et al.,  
456 2020; Yordanov et al., 2019), this measurement is equivalent to a flux of  $953 \text{ H}^+ \cdot \text{sec}^{-1}$  per  
457 lysosome. As ten protons are pumped by the V-ATPase for every three ATPs hydrolyzed (Zhao  
458 et al., 2015), the flux corresponds to approximately 191 molecules of ATP hydrolyzed per  
459 lysosome per sec. Considering that there are 1 to 2 pumps on average per lysosome, the  
460 calculated flux is within the same order as the V-ATPase activity measured previously in cell-  
461 free systems in mammals ( $29.2 \text{ ATP per V-ATPase} \cdot \text{sec}^{-1}$ ; Abbas et al., 2020) and yeast (from  
462  $3.7\text{-}300 \text{ ATP per V-ATPase} \cdot \text{sec}^{-1}$ ; Vasanthakumar et al., 2019; Uchida et al., 1985; Sharma and  
463 Wilkens, 2017; Kawasaki-Nishi, 2001). The rate estimated here in intact cells may differ from  
464 some of the *in vitro* measurements due to the effect of regulatory factors and parameters, such  
465 as availability of counterions, phosphorylation, membrane lipid composition, etc. that are not  
466 encountered in cell-free enzyme assays.

467 In summary, we have introduced a new, powerful probe to visualize and quantify V-  
468 ATPases in eukaryotic cells. This probe enabled us to assess the subcellular distribution of V-  
469 ATPases and, in combination with ratiometric pH determinations, estimate the rate of flux for  
470 individual lysosome-associated V-ATPase complexes in intact cells. These results reveal  
471 heterogeneity in the lysosomal compartment that is a result of vesicle location dependent  
472 differences in V-ATPase density. We also expect this probe to be a useful label for super-  
473 resolution imaging and electron microscopy, and anticipate that SidK-AL568 and similar SidK-  
474 derived probes will contribute not only to studies of V-ATPase complexes in cells, but to our  
475 understanding of endocytic and secretory processes more generally.

476

477



## 478 MATERIALS AND METHODS

### 479 **Cell culture**

480 HeLa and RAW264.7 cells were obtained from and authenticated by the American Type  
481 Culture Collection (ATCC). Both cell lines tested negative for mycoplasma contamination by  
482 DAPI staining. HeLa cells were grown in DMEM containing L-glutamine and 10% heat-  
483 inactivated fetal calf serum (FCS; MultiCell, Wisent) at 37°C under 5% CO<sub>2</sub>. RAW264.7 cells  
484 were grown in RPMI-1640 medium containing L-glutamine and 10% heat-inactivated FCS, at  
485 37°C under 5% CO<sub>2</sub>.

486 To obtain non-polarized human monocyte-derived macrophages (M0 hMDMs),  
487 peripheral blood mononuclear cells (PBMCs) were isolated from the blood of healthy donors by  
488 density-gradient separation with Lympholyte-H (Cedarlane). Human monocytes were then  
489 separated by adherence and incubated in RPMI-1640 containing L-glutamine, 10% heat-  
490 inactivated FCS, 100 U.mL<sup>-1</sup> penicillin, 100 µg.mL<sup>-1</sup> streptomycin, 250 ng.mL<sup>-1</sup> amphotericin B  
491 and 25 ng.mL<sup>-1</sup> hM-CSF (PeproTech) for 5 to 7 days, at 37°C under 5% CO<sub>2</sub>, before  
492 experimentation.

493

### 494 **Reagents**

495 Mammalian expression vectors were obtained from the following sources: pmCherry-N1  
496 (Clontech) and pEGFP-N1 (Clontech), sec61b-GFP (Addgene; plasmid no. 121159), PM-GFP  
497 (Teruel et al., 1999), Rab5A-GFP (Roberts et al., 2000), PX-GFP (Kanai et al., 2001), Rab7-  
498 GFP (Bucci et al., 2000), LAMP1-GFP (Martinez et al., 2000), ORP1L-GFP (Rocha et al., 2009),  
499 Arl8b-GFP (Johnson et al., 2016). V<sub>0a1</sub>-, V<sub>0a2</sub>-, and V<sub>0a3</sub>-GFP were the kind gift of Dr. Shuzo  
500 Sugita (UHN, Toronto).

501 Primary antibodies were purchased from the following vendors: anti-human LAMP1  
502 (Developmental Studies Hybridoma Bank; catalogue no. H4A3-s), anti-VapB (Sigma-Aldrich;



503 catalogue no. HPA013144), anti-TGN46 (Abcam; catalogue no. ab50595), anti-GM130 (BD  
504 Transduction Laboratories; catalogue no. 610822), anti-V1A (Abnova; catalogue no.  
505 H00000523-M02). Secondary antibodies conjugated with Alexa Fluor-405, -488, -555 or -647  
506 were purchased from Jackson ImmunoResearch Labs.

507 Fluorescently-conjugated 10 kDa dextrans, Alexa Fluor-405 and Alexa Fluor-568 NHS  
508 esters, and fluorescently conjugated phalloidin and streptavidin were purchased from Invitrogen.  
509 Concanamycin A, nigericin, DAPI, propidium iodide and cresyl violet were from Sigma-Aldrich.  
510 Sheep red blood cells (SRBC; 10% suspension) were from MP Biomedicals. Anti-sheep red  
511 blood cell antibodies were from Cedarlane Laboratories. Paraformaldehyde (PFA; 16% wt/vol)  
512 was from Electron Microscopy Sciences.

513

#### 514 **SidK-GFP/mCherry plasmid construction**

515 SidK<sub>1-278</sub> was amplified by PCR using plasmid pSAB35 (Abbas et al., 2020) as a  
516 template, with the following forward and reverse primers, respectively: 5´-  
517 GAGGAGGAATTCATGTCTTTTATCAAGGTAGGTATAAAAATG-3´ and 5´-  
518 GAGGAGGGATCCCCTTTGCTTAAAGCATTTAATTTTTTCG-3´. The PCR product was digested  
519 with EcoRI and BamHI (New England Biolabs), and ligated into pmCherry-N1 and pEGFP-N1  
520 plasmids that had been digested with the same restriction enzymes.

521 For illustrative purposes, a model of yeast V-ATPase with SidK-GFP bound (Fig. 1B)  
522 was generated from PDB accession no. 5VOX, 1GFL and 6O7T, using *UCSF ChimeraX*  
523 (Goddard et al., 2018).

524

#### 525 **Purification of SidK<sub>1-278</sub> protein**

526 To purify SidK<sub>1-278</sub>-3xFLAG, *Escherichia coli* strain BL21 was transformed with pSAB35  
527 (Abbas et al., 2020) and grown at 30°C with shaking in 1 L LB medium (BioShop) supplemented  
528 with 50 mg.L<sup>-1</sup> kanamycin. At an OD<sub>600</sub> of 0.6-0.8, protein expression was induced with 1 mM

529 IPTG and cells grown overnight at 16°C. All subsequent steps were performed at 4°C. Cells  
530 were harvested by centrifugation at 5,250 ×g, resuspended in 25 mL HisTrap Buffer (50 mM  
531 Tris-HCl pH 7.4, 25 mM imidazole, and 300 mM NaCl) and lysed by sonication. The cell lysate  
532 was centrifuged at 38,000 ×g and the supernatant was loaded onto a 5 mL HisTrap Ni-NTA  
533 column (GE Healthcare). The column was washed with HisTrap Buffer and protein eluted with a  
534 linear gradient of imidazole from 25 to 300 mM in HisTrap Buffer over 10 column volumes.

535 Fractions containing 6×his-SidK<sub>1-278</sub>-3×FLAG were pooled, mixed with TEV protease,  
536 and dialyzed against 2 L Dialysis Buffer (50 mM Tris-HCl pH 7.4 and 300 mM NaCl) with 1 mM  
537 dithiothreitol (DTT) overnight. Cleaved protein was dialyzed against 2×1 L Dialysis Buffer to  
538 remove imidazole and DTT and passed through a 5 mL HisTrap column. The column was  
539 washed with HisTrap Buffer and the flowthrough and wash were collected, pooled, and  
540 concentrated in a centrifugal concentrating device (EMD Millipore). To remove aggregated  
541 protein, SidK<sub>1-278</sub>-3×FLAG was further purified with a Superdex 200 10/300 Increase gel filtration  
542 column (GE Healthcare) equilibrated with 50 mM Tris-HCl pH 7.4 and 150 mM NaCl. Fractions  
543 containing protein were pooled, concentrated, flash-frozen in liquid N<sub>2</sub>, and stored at -80°C.

544

#### 545 **Purification of *Saccharomyces cerevisiae* V-ATPase using SidK**

546 *Saccharomyces cerevisiae* strain BJ2168 was grown in 11 L yeast extract peptone  
547 dextrose medium (YPD; BioShop) in a Microferm fermenter (New Brunswick Scientific) at 30°C,  
548 with aeration of 34 cubic feet per hour, and stirring at 300 rpm. Yeast were harvested after 18 h  
549 (OD<sub>660</sub> = 4.5) by centrifugation at 4,000 ×g for 15 min at 4°C. All subsequent steps were  
550 performed at 4°C. Cell walls were broken by bead beating in lysis buffer (phosphate-buffered  
551 saline, pH 7.4, 8% (w/v) sucrose, 2% (w/v) sorbitol, 2% (w/v) glucose, 5 mM  $\alpha$ -aminocaproic  
552 acid, 5 mM *p*-aminobenzoic acid, 5 mM EDTA, and 0.001% (w/v) PMSF). Cellular debris was  
553 removed by centrifugation at 3,000 ×g for 10 min and cell membranes were collected by

554 ultracentrifugation at 152,957  $xg$  for 40 min. The membrane pellet was resuspended in 36 mL  
555 lysis buffer, divided into 4 aliquots, flash-frozen in liquid  $N_2$ , and stored at  $-80^\circ C$ . Two membrane  
556 pellets (corresponding to half a fermenter growth) were thawed and solubilized with addition of  
557 n-dodecyl- $\beta$ -D-maltopyranoside (DDM, Anatrace) to 1% (w/v) final concentration, and DDM-  
558 solubilized *S. cerevisiae* V-ATPase isolated with M2 Affinity agarose gel (Sigma-Aldrich) pre-  
559 loaded with SidK<sub>1-278</sub>-3 $\times$ FLAG as described previously (Abbas et al., 2020). Protein purity was  
560 confirmed by SDS-PAGE using 4–20% Mini-PROTEAN TGX protein Gels (BioRad).

561

## 562 **Transient DNA Transfection**

563 HeLa cells were plated at on 18 mm glass coverslips at a concentration of  $\approx 5 \times 10^4$   
564 cells.mL<sup>-1</sup>, 16-24 hr prior to transfection. FuGENE 6 (Promega) transfection reagent was used  
565 according to the manufacturer's instructions to transfect HeLa cells at a 3:1 ratio (using 1.5  $\mu$ L  
566 FuGENE 6 and 0.5  $\mu$ g DNA per well). RAW264.7 cells were plated on 18 mm glass coverslips  
567 at  $\approx 2 \times 10^5$  cells.mL<sup>-1</sup>, 16-24 hr prior to transfection. FuGENE HD (Promega) transfection reagent  
568 was used to transfect RAW264.7 cells at a 3.5:1 ratio (using 1.75  $\mu$ L FuGENE HD and 0.5  $\mu$ g  
569 DNA per well). In all cases, monolayers were used for experiments 16 hr after transfection.

570

## 571 **Ratiometric fluorescence microscopy for the measurement of lysosomal pH, V-ATPase** 572 **activity and buffering power**

573 HeLa cells were plated on 18 mm glass coverslips and incubated overnight with 250  $\mu$ g.mL<sup>-1</sup>  
574 fluorescein isothiocyanate (FITC)-conjugated 10 kDa-dextran, which was then chased for 1 h in  
575 complete medium prior to imaging to visualize lysosomes. Coverslips were then mounted in a  
576 Chamlyde magnetic chamber and incubated in HBSS medium for fluorescence-based pH  
577 determinations.

578 Steady-state lysosomal pH was determined by exciting FITC-dextran labelled lysosomes  
579 sequentially at  $481 \pm 15$  nm and  $436 \pm 20$  nm, collecting emitted light at  $520 \pm 35$  nm. The

580 fluorescence intensity of FITC when excited at  $\approx 490$  nm is highly pH dependent and was used  
581 to determine the pH of lysosomes. The fluorescence when excited at  $\approx 440$  nm is much less pH  
582 dependent and was used to correct for potential photobleaching or focal changes during image  
583 acquisition, the 490 nm/440 nm fluorescence ratio of FITC is utilized to determine pH values.  
584 Multiple fields of cells were imaged, and the data processed with Volocity.

585 The 490 nm/440 nm fluorescence ratios were converted to pH by sequentially incubating  
586 the cells for 5 min in isotonic  $K^+$  solutions (143 mM KCl, 5 mM glucose, 1 mM  $MgCl_2$ , 1 mM  
587  $CaCl_2$ ) of different pH (pH 4.5, buffered with 20 mM acetic acid, pH 5.5, 6.5, 7.5 solutions  
588 buffered with 20 mM MES), containing 10  $\mu M$  nigericin and 5  $\mu M$  monensin. Background-  
589 subtracted 490/440 nm fluorescence ratios were then plotted against pH, and the data fitted by  
590 least squares were used to interpolate the lysosomal pH.

591 For V-ATPase activity determinations, HeLa cells were acutely treated with 500 nM  
592 concanamycin A and images were acquired at 30 s intervals for 10 min. The time dependence  
593 of the resulting pH changes was then plotted in GraphPad Prism 6, and the initial rates of  
594 alkalization (per cell) were determined within 2 min of addition of concanamycin A.

595 For the determination of buffering power, HeLa cells containing FITC-dextran loaded  
596 lysosomes were challenged with 0.5 mM  $NH_4Cl$  and the resulting change in fluorescence  
597 intensity (490 nm/440 nm) was measured immediately. The corresponding pH change,  
598 calculated as above, was used to calculate the concentration of  $NH_4^+$  formed inside the  
599 lysosome, using the Henderson-Hasselbalch equation, and the buffering capacity estimated as  
600  $\Delta[NH_4^+]_{lys}/\Delta pH_{lys}$ .

601

## 602 **Lysosome labeling, cresyl violet staining and dissipation of organellar pH**

603 For identification of lysosomes, HeLa cells were incubated overnight with 100  $\mu g \cdot mL^{-1}$   
604 fluorescently-conjugated 10 kDa-dextran at the time of transient transfection, 16 to 24 hr prior to

605 experiments. The next day, monolayers were washed 3× with PBS and placed in HBSS medium  
606 at 37°C for 1 hr to chase the dextran to lysosomes. Monolayers were then imaged live by  
607 confocal microscopy.

608 For cresyl violet staining, HeLa cells, seeded on 18 mm glass coverslips at a  
609 concentration of  $1 \times 10^5$  cells.mL<sup>-1</sup>, were labeled with fluorescent dextran as described above.  
610 Monolayers were then incubated at 37°C with 1 μM cresyl violet in Hanks' Balanced Salt  
611 Solution (HBSS; MultiCell, Wisent) for 5 min, washed 3 times and imaged live by confocal  
612 microscopy. In some cases, organellar pH was dissipated prior to cresyl violet staining. To this  
613 end the cells were treated for 30 min with 250 nM concanamycin A and 10 mM NH<sub>4</sub>Cl in  
614 HBSS. After this treatment, monolayers were stained with 1 μM cresyl violet and imaged live, as  
615 above.

616

#### 617 **Fluorescent labeling of SidK<sub>1-278</sub>**

618 Prior to labeling, purified SidK<sub>1-278</sub>-3×FLAG (see above; referred to in the text as SidK)  
619 was buffer exchanged into PBS using a centrifugal concentrator (EMD Millipore). Following this,  
620 SidK was directly labeled by conjugation with Alexa Fluor-568 NHS-ester (Invitrogen). A 10:1  
621 dye:SidK molar ratio was prepared in 0.05 M borate buffer, vortexed, and incubated shaking at  
622 500 rpm for 1 hr at room temperature. Labeled SidK (referred to as SidK-AL568) was then  
623 dialyzed in 4× 1 L PBS, to remove unincorporated dye. One volume of 100% glycerol was  
624 added to the SidK-AL568 for stability, and stored at 4°C.

625 The fraction of SidK labeled with Alexa Fluor-568 was determined using absorbance  
626 spectroscopy on a Nanodrop 2000 instrument (Thermo Scientific). SidK and SidK-AL568 was  
627 diluted to 0.1 mg.mL<sup>-1</sup> in PBS. The A<sub>280</sub> of SidK and its molecular weight (34,646 g.mol<sup>-1</sup>) was  
628 used to calculate its extinction coefficient ( $\epsilon_{\text{SidK}} = 41,690 \text{ cm}^{-1} \cdot \text{M}^{-1}$ ). Then, the A<sub>280</sub> and A<sub>577</sub>  
629 ( $\lambda_{\text{max}}$  of Alexa Fluor 568) of SidK-AL568 were measured and the degree of labeling (moles of  
630 dye per mole of protein) for SidK-AL568 calculated, using the following two equations, along

631 with the  $\epsilon$  dye value for Alexa Fluor 568 ( $91,300 \text{ cm}^{-1} \cdot \text{M}^{-1}$ ) and the correction factor for the A280  
632 contribution of Alexa Fluor-568 ( $CF_{280} = 0.46$ ):

$$(1) \text{ protein concentration (M)} = \frac{[A_{280} - (A_{577} \times CF_{280})] \times \text{dilution factor}}{\epsilon \text{ SidK}}$$

$$(2) \text{ moles dye per mole protein} = \frac{A_{577} \times \text{dilution factor}}{\epsilon \text{ dye} \times \text{protein concentration}}$$

633 The number of dye particles per SidK-AL568 molecule was determined by single-  
634 molecule photobleaching imaging (Liesche et al., 2015). Briefly, a  $10^6$  dilution of SidK-AL568  
635 was prepared and added to clean coverslips, creating a monodispersed sample. Monodispersed  
636 SidK-AL568 was then imaged continuously by confocal microscopy at  $\approx 5 \text{ frames} \cdot \text{sec}^{-1}$ , until  
637 spot disappearance occurred through photobleaching. Time series images were analyzed using  
638 Volocity v6.3 software (Quorum Technologies), and SidK-AL568 molecule fluorescence over  
639 time plotted to generate traces where the number of steps required for SidK-AL568 spot  
640 disappearance were counted. Each step corresponded to a single Alexa 568 dye molecule  
641 conjugated to SidK. The average fluorescence value for *bona fide* single bleach step SidK-  
642 AL568 was used to calculate the percent of SidK-AL568 in the monodispersed population with  
643 1, 2, 3, or 4 or 5+ dye molecules per SidK.

644

#### 645 **Culturing of yeast and immunofluorescence of yeast spheroplasts**

646 Wild type (*MAT $\alpha$  ura3-52 leu2-3,112 his4-519 ade6*) and *vma1 $\Delta$*  (*MAT $\alpha$  ura3-52 leu2-*  
647 *3,112 his4-519 ade6 vma1 $\Delta$ ::LEU2*) *S. cerevisiae* strains were kindly gifted by Dr. Morris  
648 Manolson (University of Toronto). Yeast cultures were routinely grown at  $30^\circ\text{C}$ , with shaking, in  
649 YPD medium (BD Biosciences).

650 For spheroplast preparation, overnight cultures were diluted 1:100 in YPD broth and  
651 grown at  $30^\circ\text{C}$  for 2 hr. One mL of yeast culture was then fixed with 4% PFA for 30 min, while  
652 shaking at room temperature. After washing cells 2x with 0.1 M  $\text{KHPO}_4$  pH 6.5, yeast were

653 washed 1x in K-Sorb (1.2 M sorbitol in 0.1 M  $\text{KPHO}_4$ ) and resuspended in 0.5 mL K-Sorb  
654 containing 5  $\mu\text{L}$   $\beta$ -mercaptoethanol and 10  $\text{mg}\cdot\text{mL}^{-1}$  zymolyase 20T (MP Biomedicals). Cells  
655 were shaken at room temperature for 30 min, and gently washed 2x with K-Sorb. After final  
656 resuspension in 0.5 mL K-Sorb, 20  $\mu\text{L}$  of spheroplast suspension was spread on a concanavalin  
657 A-coated slide and allowed to adhere for 15 min at room temperature. Following this,  
658 spheroplasts were permeabilized/blocked for 30 min in PBS 0.1% Tween-20 containing 5% BSA  
659 and 5% skim milk. Samples were then incubated in the same buffer containing 1:200 SidK-  
660 AL568 and 1  $\mu\text{g}\cdot\text{mL}^{-1}$  DAPI for 30 min at room temperature. After staining, slides were washed  
661 3x with PBS and visualized by confocal microscopy.

662

### 663 **Immunofluorescence of mammalian cells**

664 After fixing in 3% PFA for 10 min at room temperature, cells were washed in PBS and  
665 permeabilized/blocked in PBS containing 5% BSA and 0.1% Triton X-100 for 30 min at room  
666 temperature. Samples were then incubated with primary staining reagents for 30 min at room  
667 temperature. Primary antibody dilutions were: LAMP1 (1:50), VapB (1:100), TGN46 (1:100),  
668 GM130 (1:100), V1A (1:100). For mitochondrial staining, fluorescently-conjugated streptavidin  
669 was used at 1:100 dilution. SidK-AL568 was used at 1:100, 1:50 or 1:25 dilution, as indicated in  
670 the text. Where indicated, a 5-fold excess of unlabeled SidK<sub>1-278</sub> was used in the  
671 blocking/permeabilization step, to block SidK-AL568 binding sites prior to the addition of SidK-  
672 AL568. After primary staining, monolayers were washed 3x with PBS, and samples incubated  
673 30 min at room temperature with Alexa Fluor-conjugated secondary antibodies at a 1:1000  
674 dilution. Where indicated, 1:1000 fluorescent phalloidin or 1  $\mu\text{g}\cdot\text{mL}^{-1}$  DAPI was added together  
675 with the secondary antibodies. Samples were washed 3x with PBS and viewed by confocal  
676 microscopy in PBS.

677

### 678 **Phagosome and sucrosome analyses**



679 For phagocytosis assays, RAW264.7 cells were plated at on 18 mm glass coverslips at a  
680 concentration of  $2 \times 10^5$  cells.mL<sup>-1</sup> and grown for 16-24 hr. Cells were transfected as described  
681 above with the constructs indicated in the text. The day of experiments, SRBCs were prepared  
682 for use in phagocytosis. Briefly, 100  $\mu$ L of SRBC suspension was washed with 3x with PBS and  
683 labeled with Alexa Fluor-405 NHS ester for 20 min, shaking at room temperature. SRBC were  
684 then opsonized with 2  $\mu$ L of rabbit anti-SRBC IgG at 37°C for 1 h. Prepared SRBCs were  
685 washed 3x with PBS and resuspended to a final volume of 1 mL in PBS. After 1:10 dilution in  
686 PBS, 25  $\mu$ L of this suspension was added to the RAW264.7 cells. Alternatively, FITC-labelled  
687 zymosan was diluted to 10 mg.mL<sup>-1</sup> in PBS and opsonized by incubation with human IgG (final  
688 IgG concentration, 5 mg.mL<sup>-1</sup>) for 30 min at room temperature. Prepared zymosan was then  
689 washed 3x with PBS and resuspended to a final volume of 20  $\mu$ L in PBS. 1  $\mu$ L of this  
690 suspension was added to RAW264.7 seeded onto coverslips. In all cases, phagocytosis was  
691 synchronized by sedimenting particles onto the cells using centrifugation at 300  $\times$ g for 1 min.  
692 After phagocytosis, monolayers were fixed in 3% PFA for 10 min at room temperature and  
693 stored in PBS until used. FITC-zymosan phagocytosis, which was used to determine the rate of  
694 acidification of the nascent phagosome, was imaged immediately after sedimentation of the  
695 particles.

696 To generate sucrosomes, transfected RAW264.7 cells were incubated for 16 to 24 hr in  
697 RPMI-1640 medium containing L-glutamine, 10% heat-inactivated FCS and 30 mM sucrose, at  
698 37°C under 5% CO<sub>2</sub>. The next day, cells were washed 3x with PBS, placed in RPMI-1640  
699 medium containing L-glutamine and 10% heat-inactivated FCS, and used for experiments as  
700 described in the text. After experiments, monolayers were fixed in 3% PFA for 10 min at room  
701 temperature and stored in PBS.

702

### 703 **Quantitation of the number of SidK-AL568 per lysosome**

704 The average fluorescence value of monodispersed SidK-AL568 molecules was used to



705 estimate the number of SidK-AL568 monomers per lysosome in HeLa cells that had been co-  
706 stained with SidK-AL568 and LAMP1. 1:25, 1:50 and 1:100 SidK-AL568 dilutions were  
707 assessed to determine the conditions required for saturation of SidK-AL568 staining, needed to  
708 estimate the maximum number of SidK-AL568 molecules bound per LAMP1<sup>+</sup> lysosome.

709

## 710 **Microscopy**

711 Confocal images were acquired using a spinning disk system (Quorum Technologies  
712 Inc.). The instrument consists of a microscope (Axiovert 200M; Zeiss), scanning unit (CSU10;  
713 Yokogawa Electric Corporation), electron-multiplied charge-coupled device camera (C9100-13;  
714 Hamamatsu Photonics), five-line (405-, 443-, 491-, 561-, and 655-nm) laser module (Spectral  
715 Applied Research), and filter wheel (MAC5000; Ludl) and is operated by Volocity v6.3. Images  
716 were acquired using a 63x/1.4 NA oil objective (Zeiss), with an additional 1.5x magnifying lens  
717 and the appropriate emission filter. For live experiments, cells were maintained at 37°C using an  
718 environmental chamber (Live Cell Instruments).

719 Ratiometric fluorescence pH measurements were acquired on an epifluorescence  
720 microscope (Axiovert 200M; Zeiss) running on Volocity v6.3, equipped with a camera (Flash  
721 4.0v2; Hamamatsu), excitation lamp (X-Cite 120; EXFO Life Sciences Group), a 63x/1.4 NA oil  
722 objective (Zeiss), the appropriate dichroic mirror (CFP/YFP; Chroma Technology), and filter  
723 wheels containing the necessary filters for FITC ratiometric fluorescence determinations  
724 (excitation at 481±15 nm or 436±20 nm, emission 520±35 nm). All experiments were performed  
725 maintaining the temperature at 37°C with an environmental controller (Medical Systems  
726 Corporation).

727

## 728 **Image analysis**

729 Image processing and analyses were performed using Volocity v6.3. Image

730 deconvolution was done on acquired Z-stacks within the Volocity Restoration module, using the  
731 iterative restoration function. Calculated fluorochrome point spread functions were used to  
732 deconvolve individual channels for 5-8 iterations, until a confidence limit of >90% was achieved.  
733 For colocalization analyses, Volocity Colocalization module was used to calculate the positive  
734 product of the differences of the mean channels (Li, 2004), which was then overlaid on merged  
735 images for visualization. Alternatively, for some colocalization analyses, Manders' overlap  
736 coefficients were calculated in Volocity, which describe the percent of various organelle markers  
737 that colocalize with SidK-AL568 (referred to as M).

738 The Volocity Ratio function was used for SidK-AL568 ratio calculations. This divides  
739 background-subtracted intensities of SidK-AL568 and lysosomal, sucrosomal or phagosomal  
740 markers (as indicated in the text), to calculate the ratio of SidK-AL568 fluorescence to that of the  
741 chosen organellar marker. The Ratio function generates a rainbow LUT ratio channel that is  
742 applied as an overlay on merged images, with a scale representing ratio values from 0 to 2.

743

#### 744 **General methodology and statistics**

745 Data calculations and normalizations were done using Microsoft Excel 2011 (Microsoft  
746 Corporation) or GraphPad Prism v9 software (GraphPad Software, Inc.). Because experiments  
747 were, for the most part, *in vitro* imaging determinations of individual cells, samples were  
748 assigned to groups according to specific experimental treatments (control vs. experimental  
749 group). The number of individual experiments and the number of determinations per experiment  
750 were selected to attain an estimate of the variance compatible with the statistical tests used,  
751 primarily student's *t* test. Each type of experiment was performed a minimum of three separate  
752 times (biological replicates) and a minimum of ten individual event determinations (equivalent,  
753 but not identical to technical replicates). Data was tested for normality, and appropriate testing  
754 applied. No data was excluded as outliers. All statistics were calculated using GraphPad Prism  
755 v9.

756

757 **Data availability**

758 Experimental datasets that support the findings of this study are available from the  
759 corresponding authors upon reasonable request.

760

761 **Online supplemental material**

762 **Figure S1** shows the (A) SidK-AL568 or (B)  $\alpha$ -V1A staining of HeLa cells before (left)  
763 and after (right) the thresholding used in the colocalization analyses (Costes et al., 2004) of  
764 Figure 4C and 4H, respectively.

765

766

767 FIGURE LEGENDS

768 **Figure 1. SidK interacts with the V-ATPase *in vitro* and when expressed in mammalian**  
769 **cells. A.** SDS-PAGE of 3×FLAG SidK<sub>1-278</sub> to illustrate purity of the probe and its ability to allow  
770 isolation of yeast V-ATPase by affinity chromatography. Bands corresponding to SidK<sub>1-278</sub> and to  
771 individual subunits of V-ATPase are labeled. **B.** Model of the yeast V-ATPase with SidK<sub>1-278</sub>-  
772 GFP bound, generated from PDB accession numbers 5VOX, 1GFL, and 6O7T. **C.** Visualization  
773 of SidK<sub>high</sub> cells. Lysosomes of HeLa cells were transfected with SidK-GFP (green) and loaded  
774 with Alexa Fluor-647-labelled 10 kDa dextran (magenta). Side panels show the individual SidK  
775 and 10 kDa dextran channels in the region denoted by the dotted square, at 2.2× magnification.  
776 **D.** Visualization of SidK<sub>low</sub> cells (green) labeled for lysosomes as in **C**. Side panels show the  
777 individual SidK and 10 kDa dextran channels denoted by the dotted square, at 2.0×  
778 magnification. **E** and **F.** Lysosomes were identified by LAMP1 immunostain (magenta) after  
779 expression of high levels of SidK-GFP (SidK<sub>high</sub>; green). Prior to fixation and immunostaining,  
780 cells were either left untreated (**E**) or permeabilized with pneumolysin (PLY) to remove excess  
781 cytosolic SidK-GFP (**F**). Side panels show the individual SidK and LAMP1 channels. Here and  
782 elsewhere, outlines of cells are indicated by dotted lines when required. Images in **C-F** are  
783 extended focus compressions of confocal images representative of ≥ 30 fields from ≥ 3 separate  
784 experiments of each type. All scale bars: 5 μm.

785

786 **Figure 2. Effect of SidK-fluorescent protein overexpression on the pH of acidic**  
787 **compartments. A.** Localization of endogenous LAMP1 (green) in untreated control cells. **B.**  
788 Localization of LAMP1 (green) in cells expressing SidK-mCherry (red). Side panels show the  
789 individual SidK and LAMP1 channels in the area denoted by the dotted square, at 2.0×  
790 magnification. Arrowheads mark sites of peripheral LAMP1 accumulation. **C.** Localization of  
791 LAMP1 (green) in cells treated with 250 nM concanamycin A for 1 hr. Arrowheads mark sites of  
792 peripheral LAMP1 accumulation. **D.** Retention of the acidotropic dye cresyl violet (magenta) in

793 cells expressing SidK-GFP (green), where lysosomes had been preloaded with Alexa Fluor-  
794 647-conjugated 10 kDa dextran (blue). Side panels show the individual channels of the area  
795 denoted by the dotted square, at 2.7× magnification. **E.** Cells expressing SidK-GFP (green) and  
796 labeled for lysosomes (blue) were treated with 250 nM concanamycin A and 10 mM NH<sub>4</sub>Cl for  
797 30 min to neutralize luminal pH. After treatment, cells were incubated with cresyl violet as in **D.**  
798 Side panels are 2.7× magnification. Images in **A-E** are extended focus images representative of  
799 ≥ 30 fields from ≥ 3 separate experiments of each type. All scale bars: 5 μm. **F.** Lysosomal pH  
800 was determined in SidK<sup>-</sup> and SidK<sup>+</sup> HeLa cells. The lysosomes of control or SidK-mCherry-  
801 transfected HeLa cells were loaded overnight with FITC-10 kDa dextran. Lysosomal pH was  
802 subsequently measured by ratiometric fluorescence microscopy as described in the Materials  
803 and Methods. For each condition, 3 independent experiments were quantified, with ≥ 20 cells  
804 per replicate. Data are means ± SEM. *p* value was calculated using unpaired, 2-tailed student's  
805 t-test. **G.** Lysosomal V-ATPase activity was measured in control and SidK-mCherry-expressing  
806 HeLa cells acutely treated with 500 nM concanamycin A. V-ATPase activity was determined  
807 from the inverse rate of alkalization upon the addition of concanamycin A. See Materials and  
808 Methods for further details. For each condition, three independent experiments were quantified,  
809 with ≥ 10 cells per replicate. Data are means ± SEM. *p* value was calculated using unpaired, 2-  
810 tailed student's t-test.

811  
812 **Figure 3. SidK-AL568 specifically labels the V-ATPase.** **A.** HeLa cells were stained with  
813 SidK-AL568 (red) as described in the Materials and Methods either directly (left) or after  
814 incubation with a 5-fold excess of unlabeled SidK<sub>1-278</sub> (right). F-actin was labeled with  
815 fluorescent phalloidin (blue). **B.** Spheroplasts of wild type or *vma1Δ* *S. cerevisiae* were prepared  
816 and stained with SidK-AL568 (red) as detailed in Materials and Methods. Nuclei were labeled  
817 with DAPI (cyan). Outlines of the spheroplasts, visualized by DIC, are indicated by dotted lines.  
818 **C** and **D.** HeLa cells were transfected with V<sub>oa2</sub>- (**C**) or V<sub>oa3</sub>-GFP (**D**) constructs (green), and

819 stained using SidK-AL568 (magenta). Nuclei were labeled with DAPI (blue). Outlines of cells are  
820 indicated by dotted lines. Side panels show the individual SidK-AL568 and V<sub>0</sub>a channels.  
821 Colocalization between SidK-AL568 and the corresponding V<sub>0</sub>a subunit is shown in orange and  
822 the calculated Manders' coefficient (M) between the a subunit and SidK-AL568 is indicated. **A-D**  
823 are extended focus compressions of confocal images representative of  $\geq 30$  fields from  $\geq 3$   
824 separate experiments of each type. All scale bars: 5  $\mu$ m.

825

826 **Figure 4. Localization of the V-ATPase in mammalian cells using SidK-AL568.**

827 **A.** HeLa cells were stained with SidK-AL568 (red), as described in Materials and Methods.  
828 Nuclei were labeled with DAPI (blue). Arrowheads mark peripheral, likely endocytic, vesicles  
829 (open) and juxtannuclear vesicles and cisternae, likely including the Golgi compartment (closed).  
830 **B-F.** V-ATPase in HeLa cells was labeled with SidK-AL568 (magenta) and co-stained for **B:**  
831 LAMP1, **C:** *trans*-Golgi, **D:** *cis*-Golgi, **E:** ER, and **F:** mitochondria (green) as described in the  
832 text. Nuclei were labeled with DAPI (blue). Side panels show the individual SidK-AL568 and  
833 organelle channels in the area denoted by the dashed square, at 1.1, 0.9, 1.1, 1.7 and 1.5 $\times$   
834 magnification, respectively. Outlines of cells are indicated by dotted lines. **G** and **H.** HeLa cells  
835 were immunostained using a commercially available V<sub>1</sub>A antibody (Abnova; catalogue no.  
836 H00000523-M02; shown in magenta) in cells co-stained for LAMP1 (**G**) or *trans*-Golgi (**H**), in  
837 green. Nuclei were labeled with DAPI (blue). Side panels show the individual  $\alpha$ -V<sub>1</sub>A and  
838 organelle channels marked by the dotted square, at 1.1 and 1.4 $\times$  magnification, respectively. **A-**  
839 **H** are extended focus images representative of  $\geq 30$  fields from  $\geq 3$  separate experiments of  
840 each type. Outlines of cells are indicated by dotted lines. Colocalization and Manders'  
841 coefficients (M) between the organellar marker and V-ATPase probe are shown in orange. All  
842 scale bars: 5  $\mu$ m.

843

844 **Figure 5. The acidification of macrophage phagosomes parallels the recruitment of the V-**  
845 **ATPase to the phagosomal membrane, as detected by SidK-AL568. A.** RAW264.7 cells  
846 were incubated with IgG-opsonized FITC-zymosan, which were sedimented by centrifugation  
847 onto the coverslip to initiate phagocytosis. Phagosomal pH changes were determined by  
848 ratiometric fluorescence microscopy, as described in the Materials and Methods. Time 0 marks  
849 the point where phagosome acidification became evident. Data points (open circles) represent  
850 the average of 2 independent experiments, with  $\geq 10$  cells per replicate. **B.** Schematic showing  
851 the stages of phagosome engulfment and maturation, with associated membrane markers. **C.** V-  
852 ATPase localization in resting RAW264.7 cells stained with SidK-AL568 (magenta). **D-H.**  
853 RAW264.7 cells that had been transfected with the indicated phagosomal maturation markers  
854 (green) were allowed to internalize IgG-opsonized SRBCs for various times before fixation. The  
855 cells were then fixed, permeabilized, and stained with SidK-AL568 (magenta). **D.** Cells  
856 expressing a plasma membrane (PM) marker, fixed 2 min after initiation of phagocytosis. **E.**  
857 Cells expressing Rab5A, fixed 5 min after initiation of phagocytosis. **F.** Cells expressing a  
858 PtdIns(3)P-specific probe, fixed 5 min after initiation of phagocytosis. **G.** Cells expressing Rab7  
859 marker, fixed 30 min after initiation of phagocytosis. **H.** Cells immunostained for LAMP1, fixed  
860 30 min after initiation of phagocytosis. **C-H** Are XY optical slices acquired near the middle of the  
861 cell or phagosome, representative of  $\geq 30$  fields from  $\geq 3$  separate experiments of each type.  
862 Outlines of cells are indicated by dotted lines. All scale bars: 5  $\mu\text{m}$ .

863  
864 **Figure 6. V-ATPase accumulates in subdomains along the phagosomal membrane and is**  
865 **excluded from ER contact sites. A.** RAW264.7 cells that had been transfected with ORP1L-  
866 GFP were allowed to internalize IgG-opsonized SRBCs and fixed after 60 min. Cells were  
867 stained with SidK-AL568 (magenta) and visualized along with ORP1L (cyan). Individual SidK-  
868 AL568 and ORP1L channels and the SidK-AL568:ORP1L fluorescence ratio ( $Ratio_{SidK-}$   
869  $AL568:ORP1L}$ ) are shown from left to right. Fluorescence ratio is pseudocolored in a rainbow LUT,

870 corresponding to ratio values from 0 to 2. **B.** RAW264.7 cells that had been transfected with  
871 Arl8b-GFP were allowed to internalize IgG-opsonized SRBCs and fixed after 30 min. Cells were  
872 stained with SidK-AL568 (magenta) and visualized along with Arl8b-GFP (cyan). Individual  
873 channels and the pseudocolored fluorescence ratio are shown from left to right. **C.** Human M0  
874 macrophages were allowed to internalize IgG-opsonized SRBCs and fixed after 30 min. Cells  
875 were fixed, permeabilized and stained with SidK-AL568 (magenta) and immunostained for  
876 endogenous VapB (cyan). Smaller panels show individual SidK-AL568, VapB and SidK-  
877 AL568:VapB fluorescence ratio channels ( $Ratio_{SidK-AL568:VapB}$ ) (top to bottom) for 3 individual  
878 phagosomes (left to right) identified by the dotted squares, all at 1.8x magnification. **A-C** are  
879 central XY optical slices optical slices acquired near the middle of the cell or phagosome  
880 representative of  $\geq 30$  fields from  $\geq 3$  separate experiments of each type. Outlines of cells are  
881 indicated by dotted lines. All scale bars: 5  $\mu\text{m}$ .

882

883 **Figure 7. Lysosomes and lysosomal tubules in a variety of cell types show V-ATPase**

884 **subdomains. A.** RAW264.7 cells transfected with ORP1L-GFP were subjected to lysosome  
885 enlargement by overnight treatment with 30 mM sucrose, as described in the Materials and  
886 Methods. Cells were stained with SidK-AL568 (magenta) and the distribution of V-ATPase in  
887 sucrosomes labeled with ORP1L (cyan) visualized. Side panels show the individual SidK-  
888 AL568, ORP1L and colocalization channels (left to right). Colocalization and Manders'

889 coefficient between ORP1L and SidK-AL568 (M) are shown in orange. **B.** RAW264.7 cells  
890 transfected with Arl8b-GFP were subjected to lysosome enlargement by overnight treatment  
891 with 30 mM sucrose. Cells were stained with SidK-AL568 (magenta) and the distribution of V-  
892 ATPase in sucrosomes labeled with Arl8b (cyan) visualized. Side panels show the individual  
893 SidK-AL568, Arl8b and colocalization channels (left to right). Colocalization and Manders'

894 coefficients between Arl8b and SidK-AL568 (M) are shown in orange. **C-E** Localization of the V-  
895 ATPase in tubular lysosomal structures in: **C.** RAW264.7 cells, **D.** human M0 macrophages, and



896 **E.** HeLa cells. Cells were stained using SidK-AL568 (magenta) and immunostained for  
897 endogenous LAMP1 (cyan). Solid white arrowheads mark lysosomal regions that are SidK<sup>+</sup>  
898 LAMP1<sup>-</sup>, while open arrowheads mark regions that are SidK<sup>-</sup> LAMP1<sup>+</sup>. Side panels show  
899 individual SidK-AL568, LAMP1 and colocalization channels (top to bottom). Colocalization and  
900 Manders' coefficients between LAMP1 and SidK-AL568 (M) are shown in orange. **A-E** are XY  
901 optical slices representative of  $\geq 30$  fields from  $\geq 3$  separate experiments of each type. All scale  
902 bars: 5  $\mu\text{m}$ .

903

904 **Figure 8. Estimation of the number of V-ATPases per lysosomal compartment. A.**

905 Photobleaching of monodisperse SidK-AL568. Representative intensity-time traces for a single  
906 SidK-AL568 labeled with 1 (top) or 2 (bottom) Alexa Fluor 568 moieties. Loss of fluorescence  
907 after complete photobleaching is shown by the dotted red lines. **B.** Histogram showing the  
908 measured number of dye molecules per SidK-AL568 monomer determined analyzing > 5000  
909 single molecule photobleaching traces. The number of SidK-AL568 molecules in each category  
910 of the histogram is indicated above the bar. **C.** HeLa cells were stained with SidK-AL568 at  
911 varying concentrations (shown in absolute concentration and as dilution). Lysosomal  
912 fluorescence was plotted to determine the concentration of SidK-AL568 required to reach  
913 maximal lysosome fluorescence, indicative of saturation of available binding sites. **D.** HeLa cells  
914 were stained with SidK-AL568 using the near-saturation conditions determined in **C** (1:50). Total  
915 fluorescence per lysosome was compared to the average fluorescence of a single molecule of  
916 SidK-AL568 and is displayed; the average number of SidK-AL568 molecules bound per  
917 lysosome is indicated by the horizontal line, as is the SE (whiskers). A total of 5715 lysosomes  
918 from 2 independent experiments were quantified. **E.** Intracellular V-ATPase distribution among  
919 lysosomes is heterogeneous. HeLa cells were stained with SidK-AL568 (magenta) using the  
920 near-saturating conditions determined in **C** (1:50), and co-stained for LAMP1 (green). Side  
921 panels show the individual LAMP1 (top), and SidK-AL568:LAMP1 colocalization channels

922 (bottom) for juxtannuclear (left) or peripheral (right) lysosomes in the areas denoted by the dotted  
923 squares. Outlines of cells and lysosomes are indicated by dotted or solid lines, respectively. **F.**  
924 SidK-AL568:LAMP1 fluorescence ratio ( $Ratio_{SidK-AL568:LAMP1}$ ) corresponding to image in **E**. The  
925 fluorescence ratio was pseudocolored in a rainbow LUT, representing ratio values from 0-2. **G.**  
926 Shell analysis of SidK distribution as a function of distance from the cell outer edge. HeLa cells  
927 were stained using SidK-AL568 and co-stained for LAMP1. Cell outlines were drawn and  
928 degraded iteratively inward by 4  $\mu\text{m}$  to create concentric shells (colored differentially) within  
929 each cell that were used to subgroup LAMP1+ lysosomes for subsequent analysis. **H.** For each  
930 shell, total fluorescence per lysosome was compared to the average fluorescence of a single  
931 molecule of SidK-AL568, and the average number of SidK-AL568 molecules bound per  
932 lysosome calculated, as a function of distance from the cell outer edge. Data are means  $\pm$  SEM  
933 of 2 independent experiments with  $\geq 5$  cells per replicate.  $N = 791, 1112, 1203, 1275$  and  $1334$   
934 lysosomes analyzed for shells 0-4, 4-8, 8-12, 12-16, and  $>16$   $\mu\text{m}$  from the cell edge,  
935 respectively. Images in **E-G** are extended focus compressions of confocal images  
936 representative of  $\geq 10$  fields from  $\geq 2$  separate experiments of each type. All scale bars: 5  $\mu\text{m}$ .

937

#### 938 SUPPLEMENTAL FIGURE LEGEND

939 **Figure S1. Demonstration of the Costes thresholding method used prior to colocalization**  
940 **analyses.** HeLa cells were stained with **(A)** SidK-AL568 (magenta) or **(B)**  $\alpha$ -V<sub>1</sub>A (magenta), as  
941 described in Materials and Methods. For both **A** and **B**, left panel shows staining before Costes  
942 thresholding, while the right panel shows the same channel after thresholding. Outlines of cells  
943 are indicated by dotted lines. Scale bars: 5  $\mu\text{m}$ . Images in **A** and **B** correspond to Figure 4C and  
944 4H, respectively.

945

946 REFERENCES

947

948 Abbas, Y.M., D. Wu, S.A. Bueler, C.V. Robinson, and J.L. Rubinstein. 2020. Structure of V-  
949 ATPase from the mammalian brain. *Science*. 367:1240–1246. doi:10.1126/science.aaz2924.

950 Alzamora, R., R.F. Thali, F. Gong, C. Smolak, H. Li, C.J. Baty, C.A. Bertrand, Y. Auchli, R.A.  
951 Brunisholz, D. Neumann, K.R. Hallows, and N.M. Pastor-Soler. 2010. PKA Regulates  
952 Vacuolar H<sup>+</sup>-ATPase Localization and Activity via Direct Phosphorylation of the A Subunit in  
953 Kidney Cells. *Journal of Biological Chemistry*. 285:24676–24685.  
954 doi:10.1074/jbc.M110.106278.

955 de Araujo, M.E.G., G. Liebscher, M.W. Hess, and L.A. Huber. 2020. Lysosomal size matters.  
956 *Traffic (Copenhagen, Denmark)*. 21:60–75. doi:10.1111/tra.12714.

957 Balgi, A.D., G.H. Diering, E. Donohue, K.K.Y. Lam, B.D. Fonseca, C. Zimmerman, M. Numata,  
958 and M. Roberge. 2011. Regulation of mTORC1 signaling by pH. *PLoS One*. 6:e21549.  
959 doi:10.1371/journal.pone.0021549.

960 Banerjee, S., K. Clapp, M. Tarsio, and P.M. Kane. 2019. Interaction of the late endo-lysosomal  
961 lipid PI(3,5)P2 with the Vph1 isoform of yeast V-ATPase increases its activity and cellular  
962 stress tolerance. *The Journal of biological chemistry*. 294:jbc.RA119.008552-9171.  
963 doi:10.1074/jbc.RA119.008552.

964 Bright, N.A., L.J. Davis, and J.P. Luzio. 2016. Endolysosomes Are the Principal Intracellular  
965 Sites of Acid Hydrolase Activity. *Current biology*: CB. 26:2233–2245.  
966 doi:10.1016/j.cub.2016.06.046.

967 Bright, N.A., B.J. Reaves, B.M. Mullock, and J.P. Luzio. 1997. Dense core lysosomes can fuse  
968 with late endosomes and are re-formed from the resultant hybrid organelles. *Journal of cell  
969 science*. 110 ( Pt 17):2027–2040.

970 Bucci, C., P. Thomsen, P. Nicoziani, J. McCarthy, and B. van Deurs. 2000. Rab7: a key to  
971 lysosome biogenesis. *Mol Biol Cell*. 11:467–480. doi:10.1091/mbc.11.2.467.

972 Butor, C., G. Griffiths, N.N. Aronson, and A. Varki. 1995. Co-localization of hydrolytic enzymes  
973 with widely disparate pH optima: implications for the regulation of lysosomal pH. *J Cell Sci*.  
974 108 ( Pt 6):2213–2219.

975 Capecchi, J., and M. Forgac. 2013. The Function of Vacuolar ATPase (V-ATPase) a Subunit  
976 Isoforms in Invasiveness of MCF10a and MCF10CA1a Human Breast Cancer Cells. *Journal  
977 of Biological Chemistry*. 288:32731–32741. doi:10.1074/jbc.M113.503771.

978 Casey, J.R., S. Grinstein, and J. Orlowski. 2009. Sensors and regulators of intracellular pH.  
979 *Nature Reviews Molecular Cell Biology*. 11:50–61.

980 Castroflorio, E., J. den Hoed, D. Svistunova, M.J. Finelli, A. Cebrian-Serrano, S. Corrochano,  
981 A.R. Bassett, B. Davies, and P.L. Oliver. 2021. The Ncoa7 locus regulates V-ATPase  
982 formation and function, neurodevelopment and behaviour. *Cell. Mol. Life Sci*. 78:3503–3524.  
983 doi:10.1007/s00018-020-03721-6.

- 984 Chen, Y., B. Wu, L. Xu, H. Li, J. Xia, W. Yin, Z. Li, D. Shi, S. Li, S. Lin, X. Shu, and D. Pei. 2012.  
985 A SNX10/V-ATPase pathway regulates ciliogenesis in vitro and in vivo. *Cell Res.* 22:333–  
986 345. doi:10.1038/cr.2011.134.
- 987 Cheng, X.-T., Y.-X. Xie, B. Zhou, N. Huang, T. Farfel-Becker, and Z.-H. Sheng. 2018.  
988 Characterization of LAMP1-labeled nondegradative lysosomal and endocytic compartments  
989 in neurons. *Journal of Cell Biology.* 217:3127–3139. doi:10.1083/jcb.201711083.
- 990 Clarke, M., L. Maddera, U. Engel, and G. Gerisch. 2010. Retrieval of the Vacuolar H<sup>+</sup>-ATPase  
991 from Phagosomes Revealed by Live Cell Imaging. *PLoS ONE.* 5:e8585.  
992 doi:10.1371/journal.pone.0008585.
- 993 Cohn, Z.A., and B.A. Ehrenreich. 1969. The uptake, storage, and intracellular hydrolysis of  
994 carbohydrates by macrophages. *The Journal of experimental medicine.* 129:201–225.
- 995 Colacurcio, D.J., and R.A. Nixon. 2016. Disorders of lysosomal acidification—The emerging role  
996 of v-ATPase in aging and neurodegenerative disease. *Ageing Research Reviews.* 32:75–88.  
997 doi:10.1016/j.arr.2016.05.004.
- 998 Costes, S.V., D. Daelemans, E.H. Cho, Z. Dobbin, G. Pavlakis, and S. Lockett. 2004. Automatic  
999 and quantitative measurement of protein-protein colocalization in live cells. *Biophys J.*  
1000 86:3993–4003. doi:10.1529/biophysj.103.038422.
- 1001 DeCourcy, K., and B. Storrie. 1991. Osmotic swelling of endocytic compartments induced by  
1002 internalized sucrose is restricted to mature lysosomes in cultured mammalian cells.  
1003 *Experimental cell research.* 192:52–60.
- 1004 Eaton, A.F., M. Merkulova, and D. Brown. 2021. The H<sup>+</sup>-ATPase (V-ATPase): from proton  
1005 pump to signaling complex in health and disease. *American Journal of Physiology-Cell  
1006 Physiology.* 320:C392–C414. doi:10.1152/ajpcell.00442.2020.
- 1007 Ferris, A.L., J.C. Brown, R.D. Park, and B. Storrie. 1987. Chinese hamster ovary cell lysosomes  
1008 rapidly exchange contents. *J Cell Biol.* 105:2703–2712. doi:10.1083/jcb.105.6.2703.
- 1009 Fisher, J.M., and R.H. Scheller. 1988. Prohormone processing and the secretory pathway. *J  
1010 Biol Chem.* 263:16515–16518.
- 1011 Futai, M., G.-H. Sun-Wada, Y. Wada, N. Matsumoto, and M. Nakanishi-Matsui. 2019. Vacuolar-  
1012 type ATPase: A proton pump to lysosomal trafficking. *Proceedings of the Japan Academy.  
1013 Series B, Physical and biological sciences.* 95:261–277. doi:10.2183/pjab.95.018.
- 1014 Goddard, T.D., C.C. Huang, E.C. Meng, E.F. Pettersen, G.S. Couch, J.H. Morris, and T.E.  
1015 Ferrin. 2018. UCSF ChimeraX: Meeting modern challenges in visualization and analysis.  
1016 *Protein Sci.* 27:14–25. doi:10.1002/pro.3235.
- 1017 Hosokawa, H., P.V. Dip, M. Merkulova, A. Bakulina, Z. Zhuang, A. Khatri, X. Jian, S.M. Keating,  
1018 S.A. Bueler, J.L. Rubinstein, P.A. Randazzo, D.A. Ausiello, G. Grüber, and V. Marshansky.  
1019 2013. The N termini of  $\alpha$ -subunit isoforms are involved in signaling between vacuolar H<sup>+</sup>-  
1020 ATPase (V-ATPase) and cytohesin-2. *The Journal of biological chemistry.* 288:5896–5913.  
1021 doi:10.1074/jbc.M112.409169.

- 1022 Hu, Y., L.R. Carraro-Lacroix, A. Wang, C. Owen, E. Bajenova, P.N. Corey, J.H. Brumell, and I.  
1023 Voronov. 2016. Lysosomal pH Plays a Key Role in Regulation of mTOR Activity in  
1024 Osteoclasts. *J Cell Biochem.* 117:413–425. doi:10.1002/jcb.25287.
- 1025 Huotari, J., and A. Helenius. 2011. Endosome maturation. *The EMBO Journal.* 30:3481–3500.  
1026 doi:10.1038/emboj.2011.286.
- 1027 Hurtado-Lorenzo, A., M. Skinner, J.E. Annan, M. Futai, G.-H. Sun-Wada, S. Bourgoin, J.  
1028 Casanova, A. Wildeman, S. Bechoua, D.A. Ausiello, D. Brown, and V. Marshansky. 2006. V-  
1029 ATPase interacts with ARNO and Arf6 in early endosomes and regulates the protein  
1030 degradative pathway. *Nature Cell Biology.* 8:124–136. doi:10.1038/ncb1348.
- 1031 Johnson, D.E., P. Ostrowski, V. Jaumouillé, and S. Grinstein. 2016. The position of lysosomes  
1032 within the cell determines their luminal pH. *The Journal of cell biology.* 212:677–692.  
1033 doi:10.1083/jcb.201507112.
- 1034 Kanai, F., H. Liu, S.J. Field, H. Akbary, T. Matsuo, G.E. Brown, L.C. Cantley, and M.B. Yaffe.  
1035 2001. The PX domains of p47phox and p40phox bind to lipid products of PI(3)K. *Nat Cell*  
1036 *Biol.* 3:675–678. doi:10.1038/35083070.
- 1037 Kawasaki-Nishi, S. 2001. The Amino-terminal Domain of the Vacuolar Proton-translocating  
1038 ATPase a Subunit Controls Targeting and in Vivo Dissociation, and the Carboxyl-terminal  
1039 Domain Affects Coupling of Proton Transport and ATP Hydrolysis. *Journal of Biological*  
1040 *Chemistry.* 276:47411–47420. doi:10.1074/jbc.M108310200.
- 1041 Levin-Konigsberg, R., F. Montaña-Rendón, T. Keren-Kaplan, R. Li, B. Ego, S. Mylvaganam, J.E.  
1042 DiCiccio, W.S. Trimble, M.C. Bassik, J.S. Bonifacino, G.D. Fairn, and S. Grinstein. 2019.  
1043 Phagolysosome resolution requires contacts with the endoplasmic reticulum and  
1044 phosphatidylinositol-4-phosphate signalling. *Nature Cell Biology.* 21:1234–1247.  
1045 doi:10.1038/s41556-019-0394-2.
- 1046 Li, Q. 2004. A Syntaxin 1, G o, and N-Type Calcium Channel Complex at a Presynaptic Nerve  
1047 Terminal: Analysis by Quantitative Immunocolocalization. *Journal of Neuroscience.* 24:4070–  
1048 4081. doi:10.1523/JNEUROSCI.0346-04.2004.
- 1049 Liesche, C., K.S. Großmayer, M. Ludwig, S. Wörz, K. Rohr, D.-P. Herten, J. Beaudouin, and R.  
1050 Eils. 2015. Automated Analysis of Single-Molecule Photobleaching Data by Statistical  
1051 Modeling of Spot Populations. *Biophysical Journal.* 109:2352–2362.  
1052 doi:10.1016/j.bpj.2015.10.035.
- 1053 Loewen, C.J.R., and T.P. Levine. 2005. A Highly Conserved Binding Site in Vesicle-associated  
1054 Membrane Protein-associated Protein (VAP) for the FFAT Motif of Lipid-binding Proteins.  
1055 *Journal of Biological Chemistry.* 280:14097–14104. doi:10.1074/jbc.M500147200.
- 1056 Lukacs, G.L., O.D. Rotstein, and S. Grinstein. 1990. Phagosomal acidification is mediated by a  
1057 vacuolar-type H(+)-ATPase in murine macrophages. *J Biol Chem.* 265:21099–21107.
- 1058 Maranda, B., D. Brown, S. Bourgoin, J.E. Casanova, P. Vinay, D.A. Ausiello, and V.  
1059 Marshansky. 2001. Intra-endosomal pH-sensitive recruitment of the Arf-nucleotide exchange  
1060 factor ARNO and Arf6 from cytoplasm to proximal tubule endosomes. *The Journal of*  
1061 *biological chemistry.* 276:18540–18550. doi:10.1074/jbc.M011577200.



- 1062 Marshansky, V., J.L. Rubinstein, and G. Grüber. 2014. Eukaryotic V-ATPase: Novel structural  
1063 findings and functional insights. *Biochimica et Biophysica Acta (BBA) - Bioenergetics*.  
1064 1837:857–879. doi:10.1016/j.bbabi.2014.01.018.
- 1065 Martinez, I., S. Chakrabarti, T. Hellevik, J. Morehead, K. Fowler, and N.W. Andrews. 2000.  
1066 Synaptotagmin VII regulates Ca(2+)-dependent exocytosis of lysosomes in fibroblasts. *The*  
1067 *Journal of cell biology*. 148:1141–1149.
- 1068 Maxfield, F.R., and T.E. McGraw. 2004. Endocytic recycling. *Nat Rev Mol Cell Biol*. 5:121–132.  
1069 doi:10.1038/nrm1315.
- 1070 Maxson, M.E., and S. Grinstein. 2014. The vacuolar-type H<sup>+</sup>-ATPase at a glance - more than a  
1071 proton pump. *Journal of cell science*. 127:4987–4993.
- 1072 McGuire, C.M., M.P. Collins, G. Sun-Wada, Y. Wada, and M. Forgac. 2019. Isoform-specific  
1073 gene disruptions reveal a role for the V-ATPase subunit a4 isoform in the invasiveness of  
1074 4T1-12B breast cancer cells. *Journal of Biological Chemistry*. 294:11248–11258.  
1075 doi:10.1074/jbc.RA119.007713.
- 1076 Mellman, I., R. Fuchs, and A. Helenius. 1986. Acidification of the Endocytic and Exocytic  
1077 Pathways. *Annu. Rev. Biochem*. 55:663–700. doi:10.1146/annurev.bi.55.070186.003311.
- 1078 Merkulova, M., T.G. Păunescu, A. Azroyan, V. Marshansky, S. Breton, and D. Brown. 2015.  
1079 Mapping the H<sup>+</sup> (V)-ATPase interactome: identification of proteins involved in trafficking,  
1080 folding, assembly and phosphorylation. *Scientific reports*. 5:1–15. doi:10.1038/srep14827.
- 1081 Michel, V., Y. Licon-Munoz, K. Trujillo, M. Bisoffi, and K.J. Parra. 2013. Inhibitors of vacuolar  
1082 ATPase proton pumps inhibit human prostate cancer cell invasion and prostate-specific  
1083 antigen expression and secretion. *Int. J. Cancer*. 132:E1–E10. doi:10.1002/ijc.27811.
- 1084 Mullock, B.M., N.A. Bright, C.W. Fearon, S.R. Gray, and J. Luzio. 1998. Fusion of Lysosomes  
1085 with Late Endosomes Produces a Hybrid Organelle of Intermediate Density and Is NSF  
1086 Dependent. *The Journal of cell biology*. 140:591–601. doi:10.1083/jcb.140.3.591.
- 1087 Naufer, A., V.E.B. Hipolito, S. Ganesan, A. Prashar, V. Zaremborg, R.J. Botelho, and M.R.  
1088 Terebiznik. 2018. pH of endophagosomes controls association of their membranes with  
1089 Vps34 and PtdIns(3)P levels. *J Cell Biol*. 217:329–346. doi:10.1083/jcb.201702179.
- 1090 Ostrowski, P.P., G.D. Fairn, S. Grinstein, and D.E. Johnson. 2016. Cresyl violet: a superior  
1091 fluorescent lysosomal marker. *Traffic*. 17:1313–1321. doi:10.1111/tra.12447.
- 1092 Parra, K.J., and P.M. Kane. 1998. Reversible Association between the V1 and V0 Domains of  
1093 Yeast Vacuolar H<sup>+</sup>-ATPase Is an Unconventional Glucose-Induced Effect. *Molecular and*  
1094 *Cellular Biology*. 18:7064–7074.
- 1095 Poëa-Guyon, S., M.R. Ammar, M. Erard, M. Amar, A.W. Moreau, P. Fossier, V. Gleize, N.  
1096 Vitale, and N. Morel. 2013. The V-ATPase membrane domain is a sensor of granular pH that  
1097 controls the exocytotic machinery. *The Journal of cell biology*. 203:283–298.
- 1098 Ramirez, C., A.D. Hauser, E.A. Vucic, and D. Bar-Sagi. 2019. Plasma membrane V-ATPase  
1099 controls oncogenic RAS-induced macropinocytosis. *Nature*. 576:1–21.

- 1100 Roberts, R.L., M.A. Barbieri, J. Ullrich, and P.D. Stahl. 2000. Dynamics of rab5 activation in  
1101 endocytosis and phagocytosis. *Journal of Leukocyte Biology*. 68:627–632.
- 1102 Rocha, N., C. Kuijl, R. van der Kant, L. Janssen, D. Houben, H. Janssen, W. Zwart, and J.  
1103 Neefjes. 2009. Cholesterol sensor ORP1L contacts the ER protein VAP to control Rab7-  
1104 RILP-p150 Glued and late endosome positioning. *J Cell Biol*. 185:1209–1225.  
1105 doi:10.1083/jcb.200811005.
- 1106 Saftig, P., and J. Klumperman. 2009. Lysosome biogenesis and lysosomal membrane proteins:  
1107 trafficking meets function. *Nat Rev Mol Cell Biol*. 10:623–635. doi:10.1038/nrm2745.
- 1108 Saw, N.M.N., S.-Y.A. Kang, L. Parsaud, G.A. Han, T. Jiang, K. Grzegorzcyk, M. Surkont, G.-H.  
1109 Sun-Wada, Y. Wada, L. Li, and S. Sugita. 2011. Vacuolar H(+)-ATPase subunits Voa1 and  
1110 Voa2 cooperatively regulate secretory vesicle acidification, transmitter uptake, and storage.  
1111 *Molecular Biology of the Cell*. 22:3394–3409. doi:10.1091/mbc.E11-02-0155.
- 1112 Sharma, S., and S. Wilkens. 2017. Biolayer interferometry of lipid nanodisc-reconstituted yeast  
1113 vacuolar H<sup>+</sup>-ATPase. *Protein Science*. 26:1070–1079. doi:10.1002/pro.3143.
- 1114 Sun-Wada, G.H., T. Toyomura, Y. Murata, A. Yamamoto, M. Futai, and Y. Wada. 2006. The  $\alpha 3$   
1115 isoform of V-ATPase regulates insulin secretion from pancreatic  $\beta$ -cells. *Journal of cell*  
1116 *science*. 119:4531–4540. doi:10.1242/jcs.03234.
- 1117 Suresh, B., A. Saminathan, K. Chakraborty, C. Cui, L. Becker, and Y. Krishnan. 2020. Tubular  
1118 lysosomes harbor active ion gradients and poise macrophages for phagocytosis. *bioRxiv*.  
1119 doi:10.1101/2020.12.05.413229.
- 1120 Swanson, J., B. Yirinec, E. Burke, A. Bushnell, and S.C. Silverstein. 1986. Effect of alterations  
1121 in the size of the vacuolar compartment on pinocytosis in J774.2 macrophages. *Journal of*  
1122 *cellular physiology*. 128:195–201. doi:10.1002/jcp.1041280209.
- 1123 Tabke, K., A. Albertmelcher, O. Vitavska, M. Huss, H.-P. Schmitz, and H. Wiczorek. 2014.  
1124 Reversible disassembly of the yeast V-ATPase revisited under in vivo conditions. *Biochem.*  
1125 *J*. 462:185–197. doi:10.1042/BJ20131293.
- 1126 Takamori, S., M. Holt, K. Stenius, E.A. Lemke, M. Grønberg, D. Riedel, H. Urlaub, S. Schenck,  
1127 B. Brügger, P. Ringler, S.A. Müller, B. Rammner, F. Gräter, J.S. Hub, B.L. De Groot, G.  
1128 Mieskes, Y. Moriyama, J. Klingauf, H. Grubmüller, J. Heuser, F. Wieland, and R. Jahn. 2006.  
1129 Molecular Anatomy of a Trafficking Organelle. *Cell*. 127:831–846.  
1130 doi:10.1016/j.cell.2006.10.030.
- 1131 Teruel, M.N., T.A. Blanpied, K. Shen, G.J. Augustine, and T. Meyer. 1999. A versatile  
1132 microporation technique for the transfection of cultured CNS neurons. *J Neurosci Methods*.  
1133 93:37–48. doi:10.1016/s0165-0270(99)00112-0.
- 1134 Toei, M., R. Saum, and M. Forgac. 2010. Regulation and isoform function of the V-ATPases.  
1135 *Biochemistry*. 49:4715–4723. doi:10.1021/bi100397s.
- 1136 Uchida, E., Y. Ohsumi, and Y. Anraku. 1985. Purification and properties of H<sup>+</sup>-translocating,  
1137 Mg<sup>2+</sup>-adenosine triphosphatase from vacuolar membranes of *Saccharomyces cerevisiae*.  
1138 *The Journal of biological chemistry*. 260:1090–1095. doi:10.1016/S0021-9258(20)71211-1.

- 1139 Vasanthakumar, T., S.A. Bueler, D. Wu, V. Beilsten-Edmands, C.V. Robinson, and J.L.  
1140 Rubinstein. 2019. Structural comparison of the vacuolar and Golgi V-ATPases from  
1141 *Saccharomyces cerevisiae*. *Proceedings of the National Academy of Sciences*. 116:7272–  
1142 7277. doi:10.1073/pnas.1814818116.
- 1143 Vieira, O.V., R.J. Botelho, L. Rameh, S.M. Brachmann, T. Matsuo, H.W. Davidson, A.  
1144 Schreiber, J.M. Backer, L.C. Cantley, and S. Grinstein. 2001. Distinct roles of class I and  
1145 class III phosphatidylinositol 3-kinases in phagosome formation and maturation. *The Journal*  
1146 *of cell biology*. 155:19–25.
- 1147 Voss, M., O. Vitavska, B. Walz, H. Wiczorek, and O. Baumann. 2007. Stimulus-induced  
1148 Phosphorylation of Vacuolar H<sup>+</sup>-ATPase by Protein Kinase A. *Journal of Biological*  
1149 *Chemistry*. 282:33735–33742. doi:10.1074/jbc.M703368200.
- 1150 Webb, B.A., F.M. Aloisio, R.A. Charafeddine, J. Cook, T. Wittmann, and D.L. Barber. 2021.  
1151 pH<sub>L</sub>ARE: a new biosensor reveals decreased lysosome pH in cancer cells. *Mol Biol Cell*.  
1152 32:131–142. doi:10.1091/mbc.E20-06-0383.
- 1153 Wijdeven, R.H., H. Janssen, L. Nahidiazar, L. Janssen, K. Jalink, I. Berlin, and J. Neefjes. 2016.  
1154 Cholesterol and ORP1L-mediated ER contact sites control autophagosome transport and  
1155 fusion with the endocytic pathway. *Nature Communications*. 7:1–14.
- 1156 Xu, L., X. Shen, A. Bryan, S. Banga, M.S. Swanson, and Z.-Q. Luo. 2010. Inhibition of Host  
1157 Vacuolar H<sup>+</sup>-ATPase Activity by a *Legionella pneumophila* Effector. *PLOS Pathogens*.  
1158 6:e1000822. doi:10.1371/journal.ppat.1000822.
- 1159 Xu, T., Q. Gan, B. Wu, M. Yin, J. Xu, X. Shu, and J. Liu. 2020. Molecular Basis for PI(3,5)P<sub>2</sub>  
1160 Recognition by SNX11, a Protein Involved in Lysosomal Degradation and Endosome  
1161 Homeostasis Regulation. *Journal of Molecular Biology*. 432:4750–4761.  
1162 doi:10.1016/j.jmb.2020.06.010.
- 1163 Yajima, S., M. Kubota, T. Nakakura, T. Hasegawa, N. Katagiri, H. Tomura, Y. Sasayama, M.  
1164 Suzuki, and S. Tanaka. 2007. Cloning and Expression of Vacuolar Proton-Pumping ATPase  
1165 Subunits in the Follicular Epithelium of the Bullfrog Endolymphatic Sac. *Zoological Science*.  
1166 24:147–157. doi:10.2108/zsj.24.147.
- 1167 Yordanov, T.E., V.E.B. Hipolito, G. Liebscher, G.F. Vogel, T. Stasyk, C. Herrmann, S. Geley, D.  
1168 Teis, R.J. Botelho, M.W. Hess, and L.A. Huber. 2019. Biogenesis of lysosome-related  
1169 organelles complex-1 (BORC) regulates late endosomal/lysosomal size through PIKfyve-  
1170 dependent phosphatidylinositol-3,5-bisphosphate. *Traffic (Copenhagen, Denmark)*. 20:674–  
1171 696. doi:10.1111/tra.12679.
- 1172 Zhao, J., S. Benlekbir, and J.L. Rubinstein. 2015. Electron cryomicroscopy observation of  
1173 rotational states in a eukaryotic V-ATPase. *Nature*. 521:241–245. doi:10.1038/nature14365.
- 1174 Zhao, J., K. Beyrakhova, Y. Liu, C.P. Alvarez, S.A. Bueler, L. Xu, C. Xu, M.T. Boniecki, V.  
1175 Kanelis, Z.-Q. Luo, M. Cygler, and J.L. Rubinstein. 2017. Molecular basis for the binding and  
1176 modulation of V-ATPase by a bacterial effector protein. *PLOS Pathogens*. 13:e1006394.  
1177 doi:10.1371/journal.ppat.1006394.



1178 Zoncu, R., L. Bar-Peled, A. Efeyan, S. Wang, Y. Sancak, and D.M. Sabatini. 2011. mTORC1  
1179 Senses Lysosomal Amino Acids Through an Inside-Out Mechanism That Requires the  
1180 Vacuolar H<sup>+</sup>-ATPase. *Science*. 334:678–683. doi:10.1126/science.1207056.

1181

Figure 1

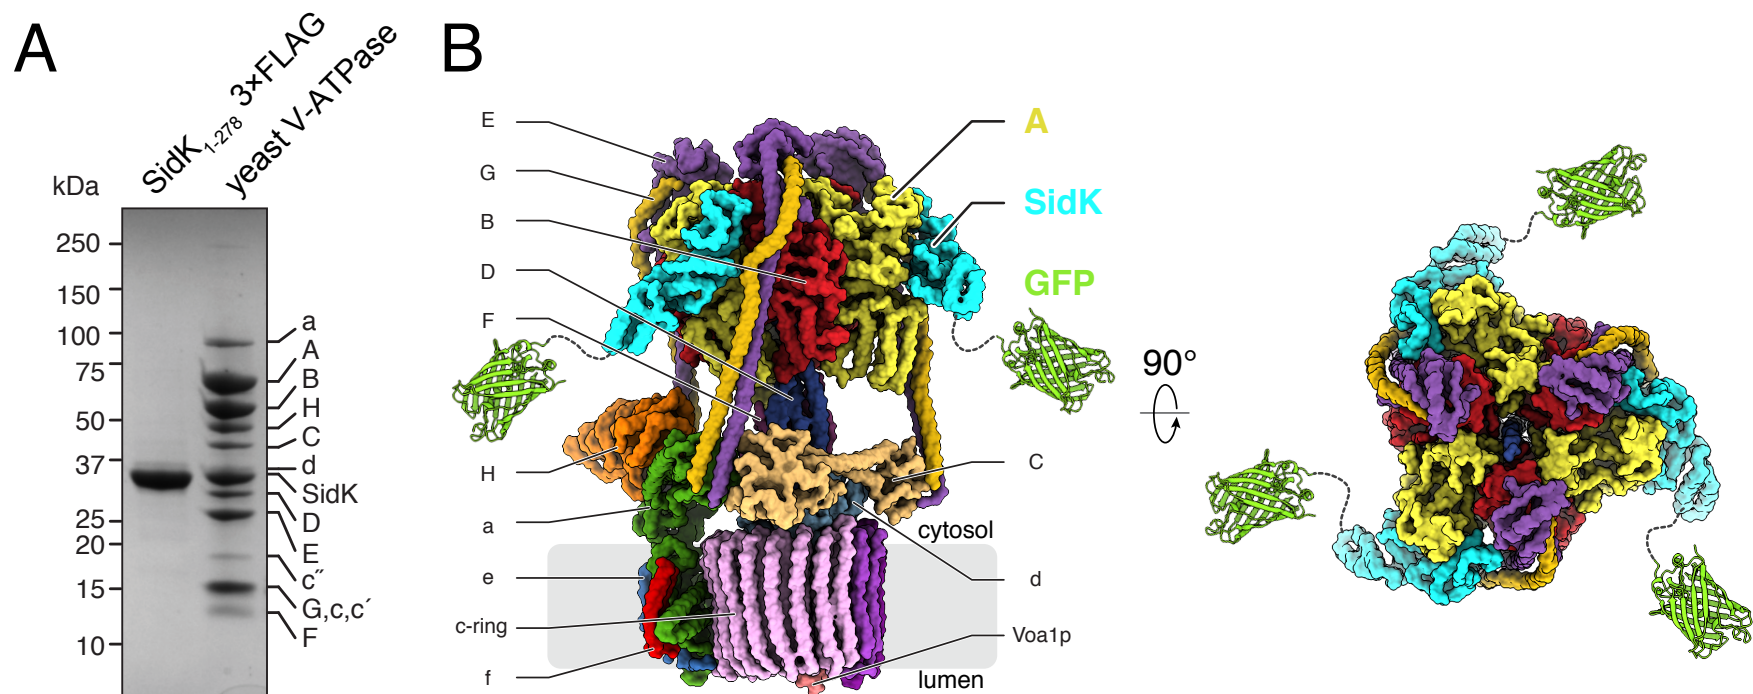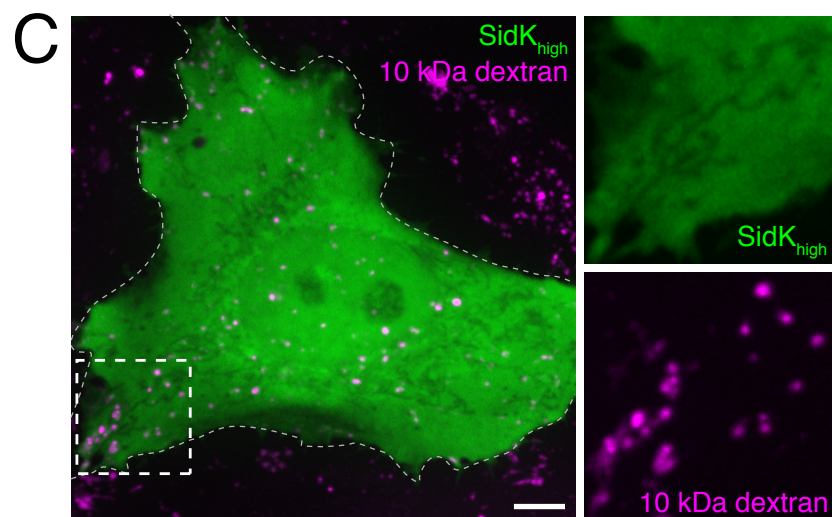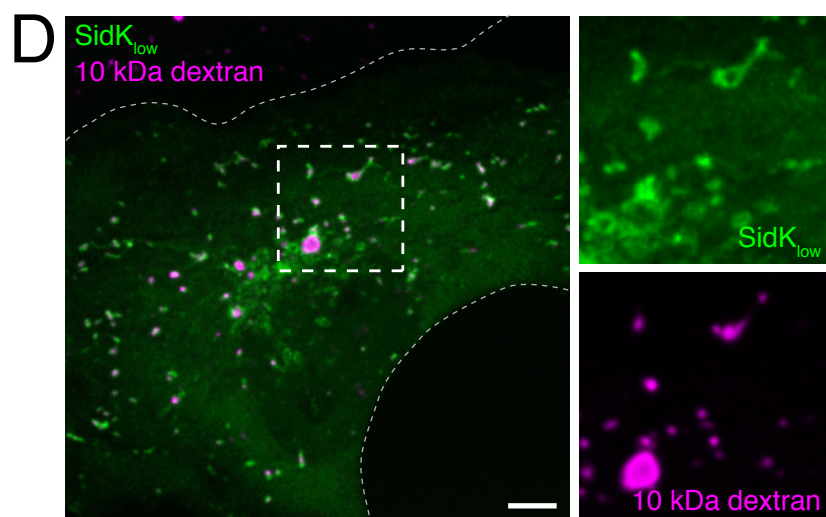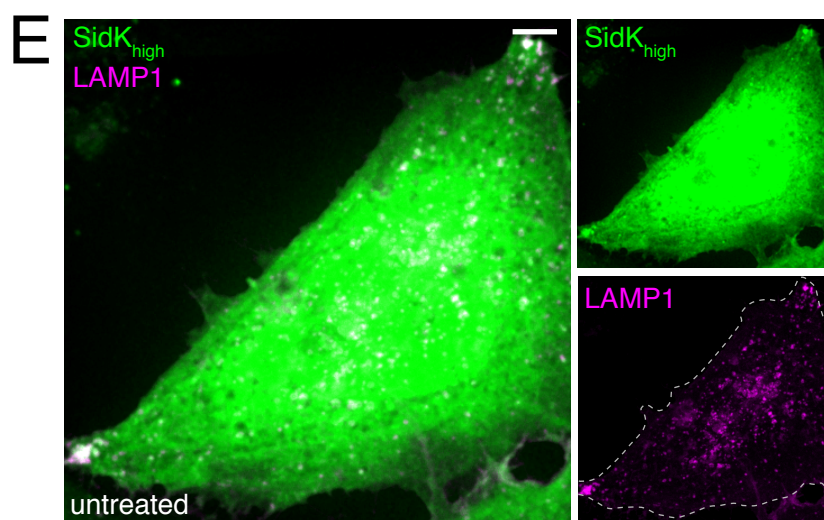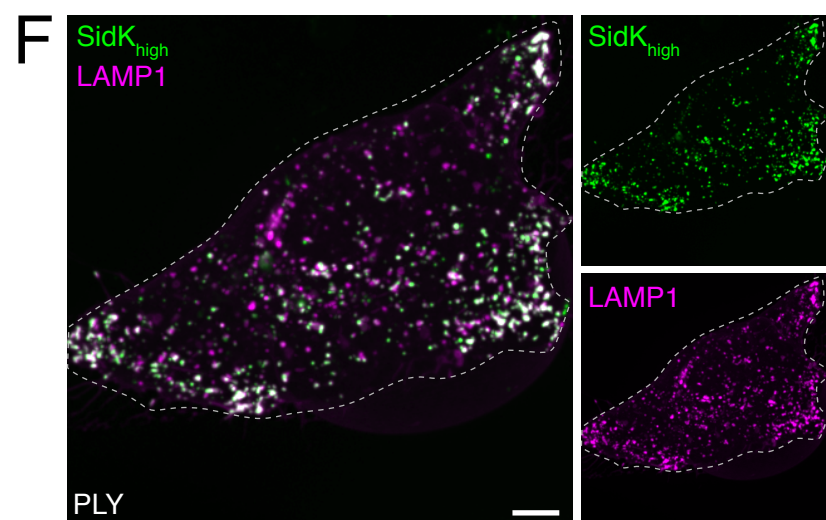

Figure 2

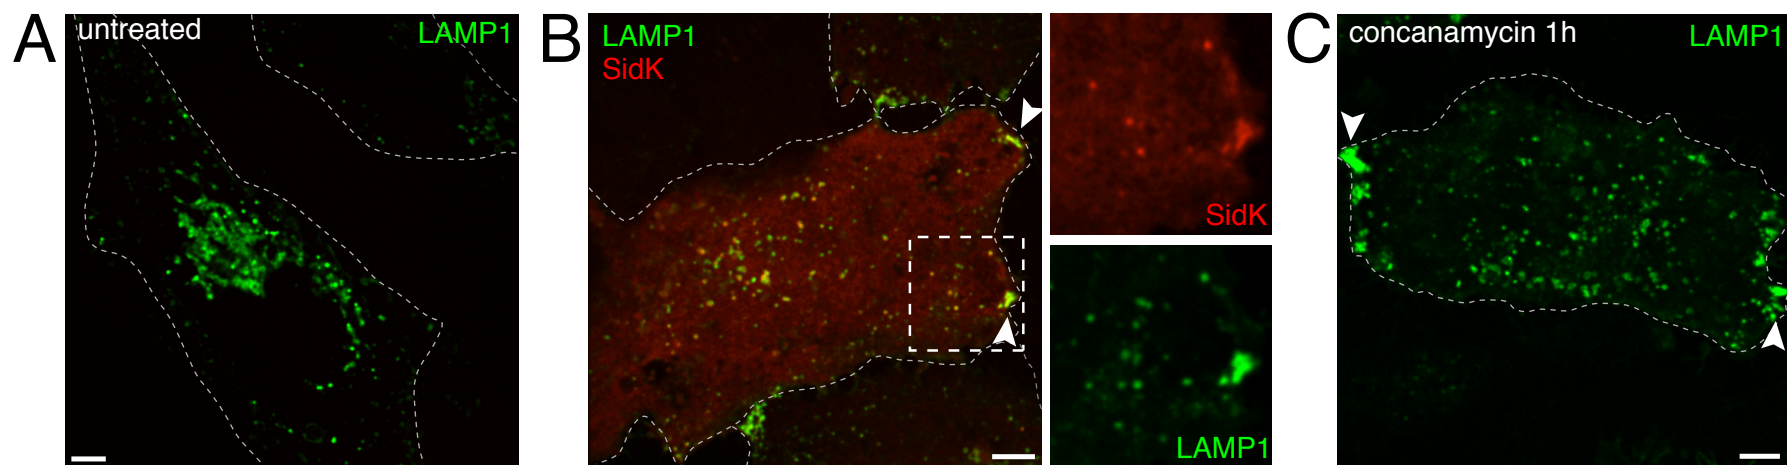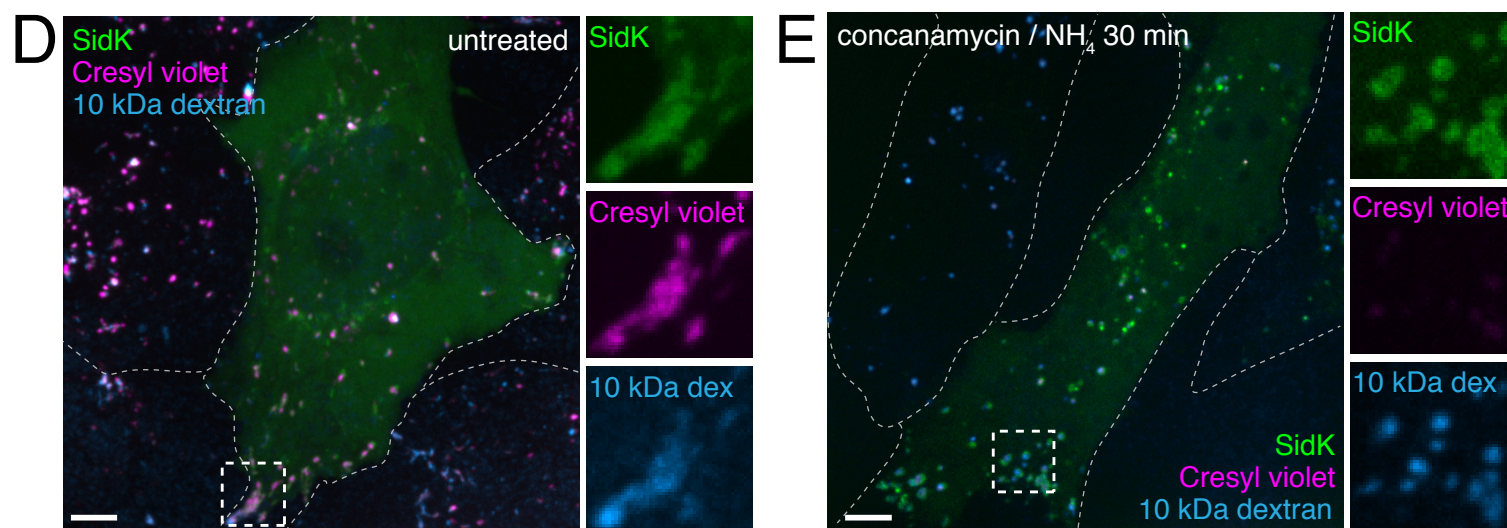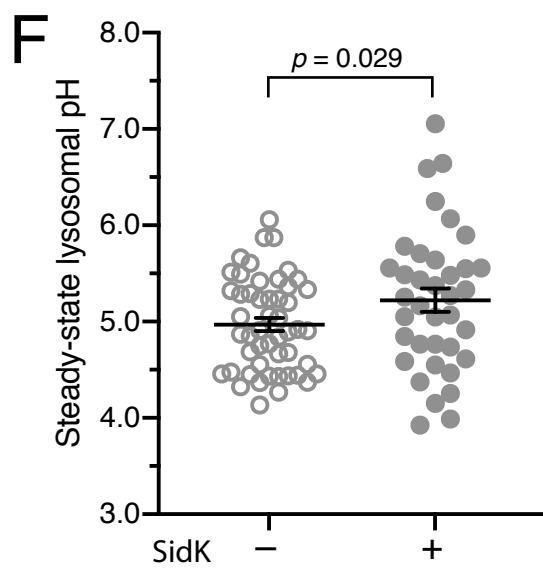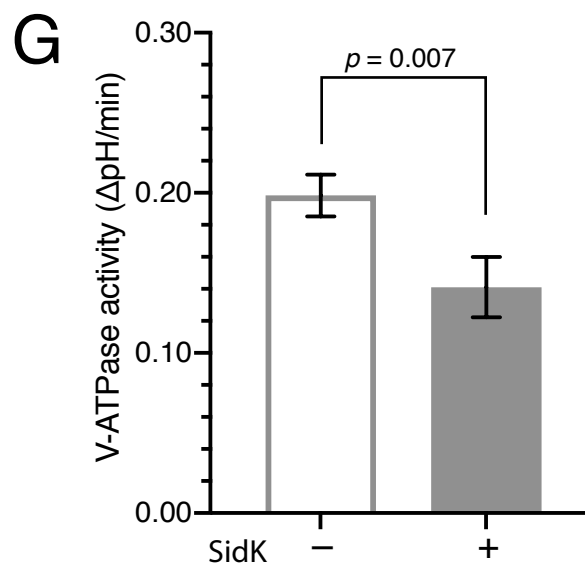



Figure 3

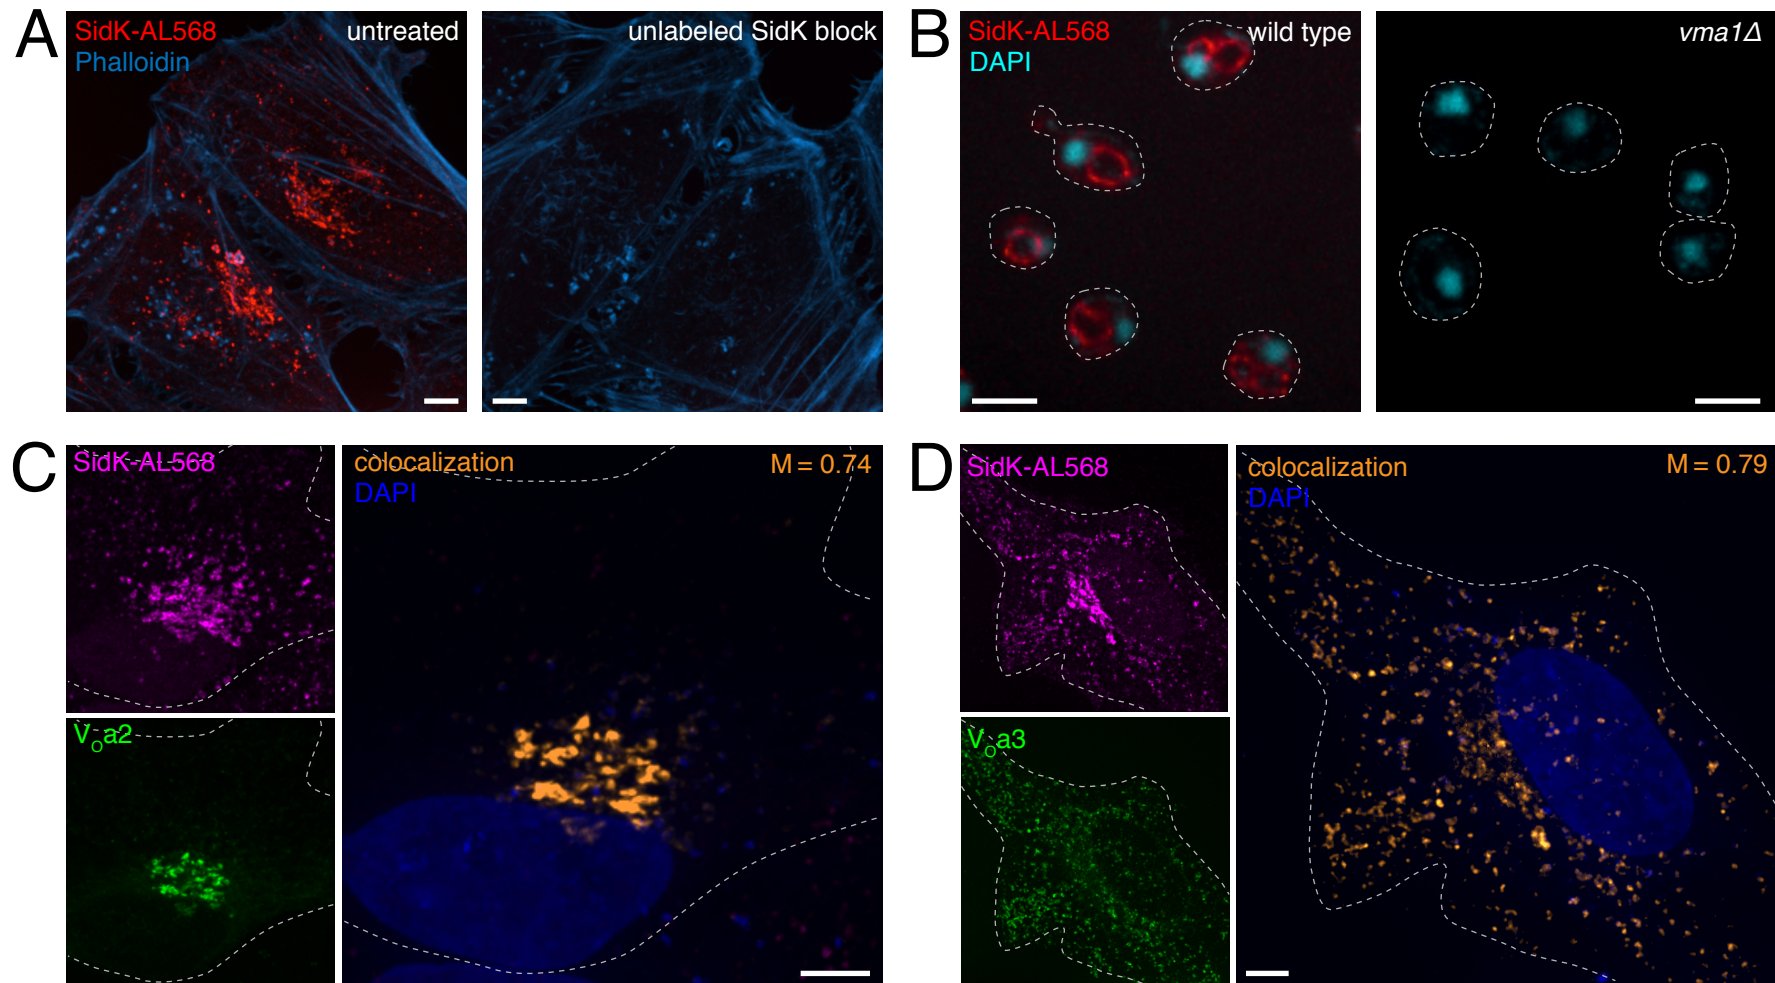

Figure 4

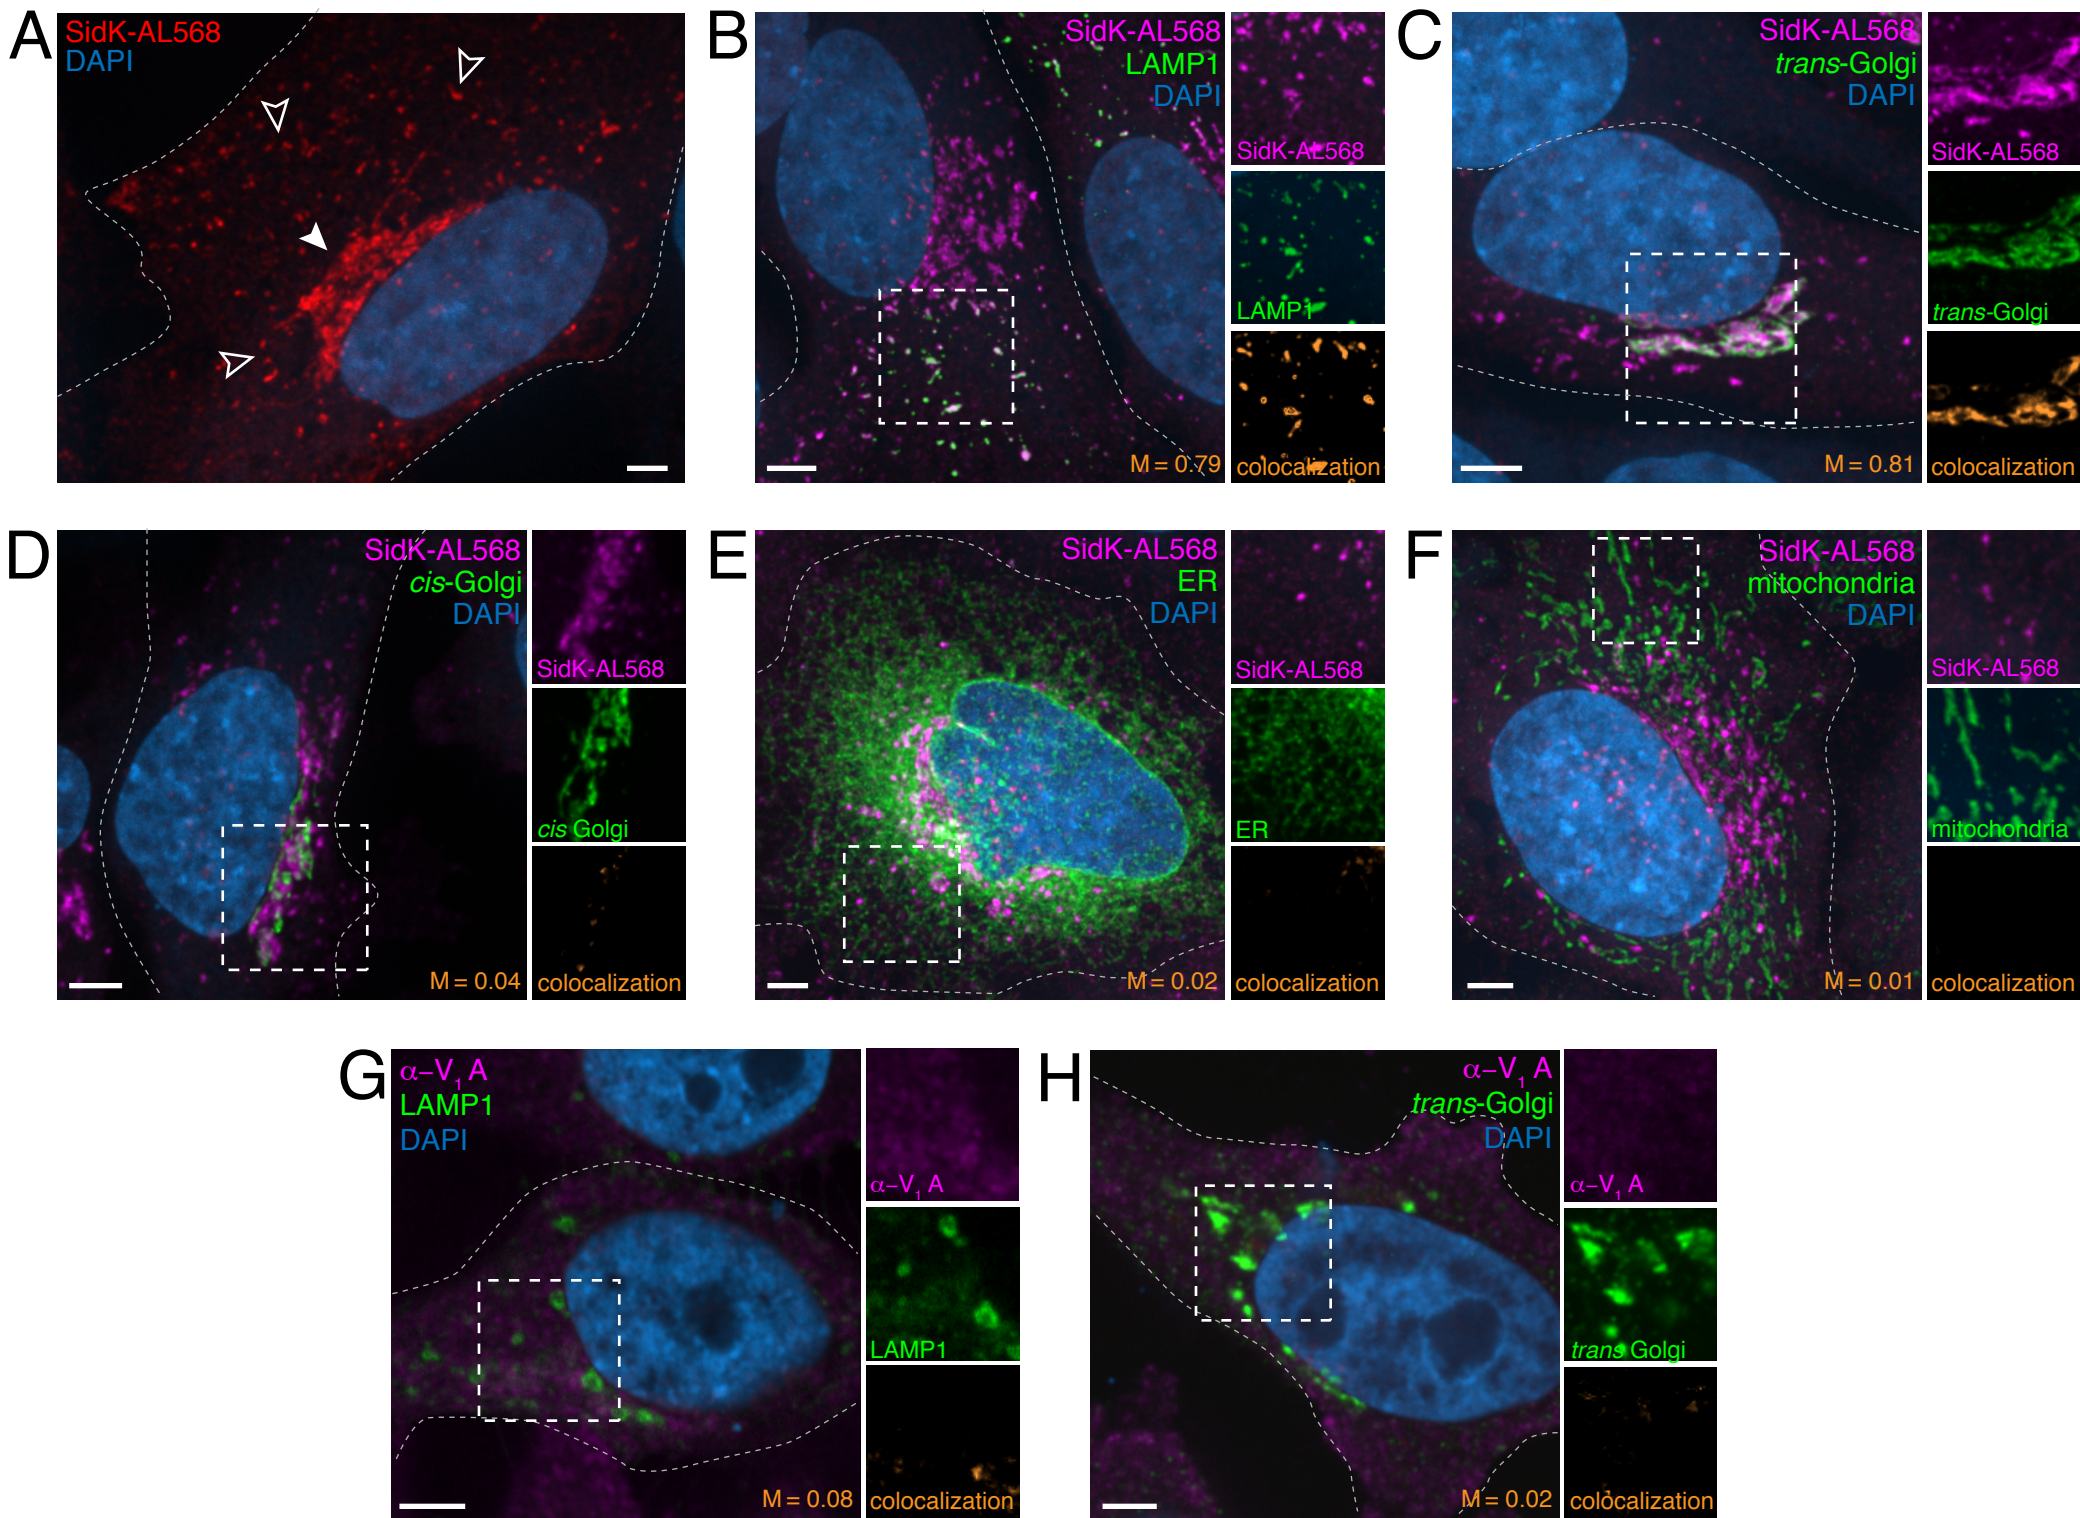



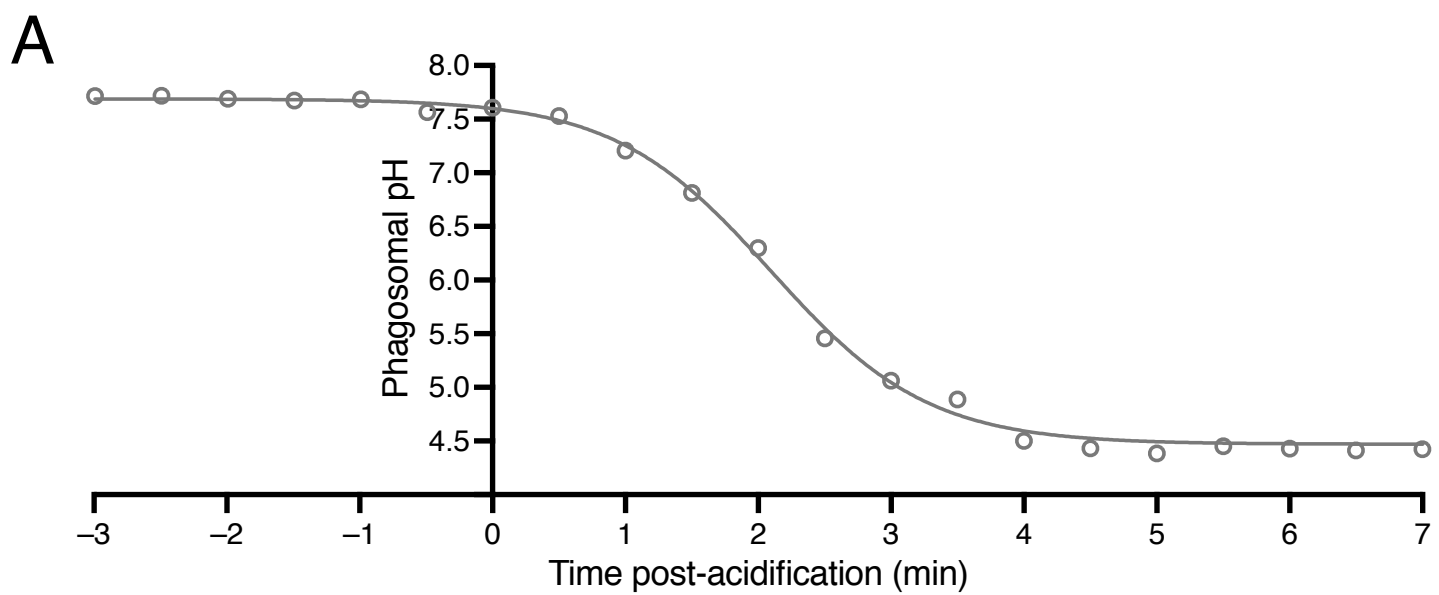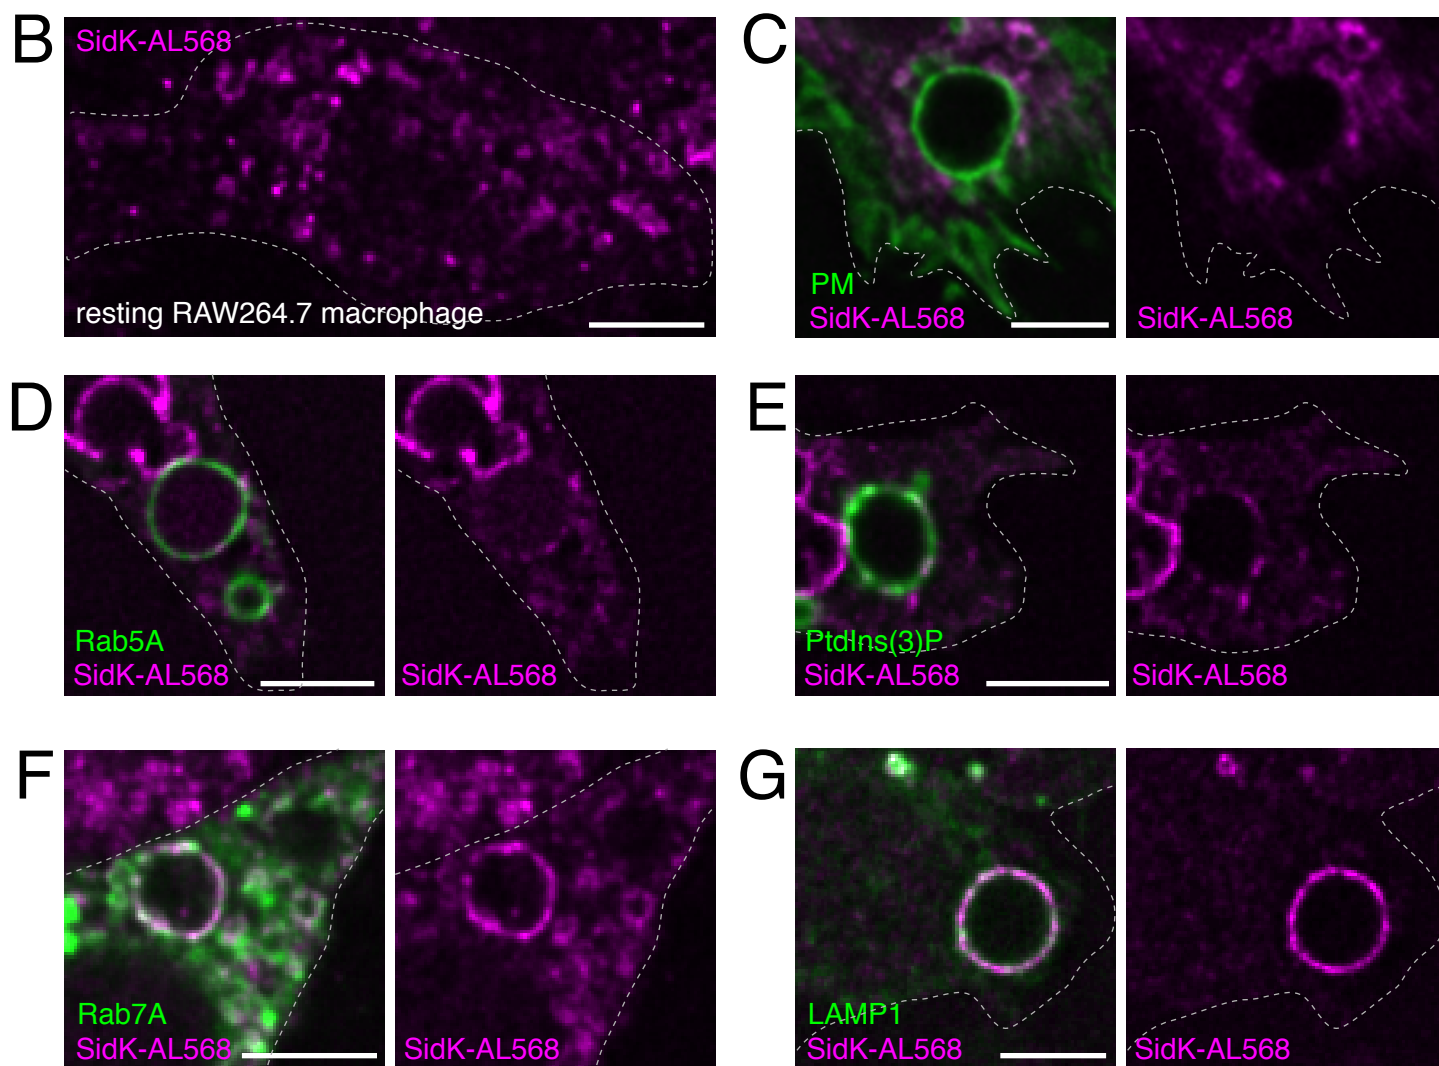

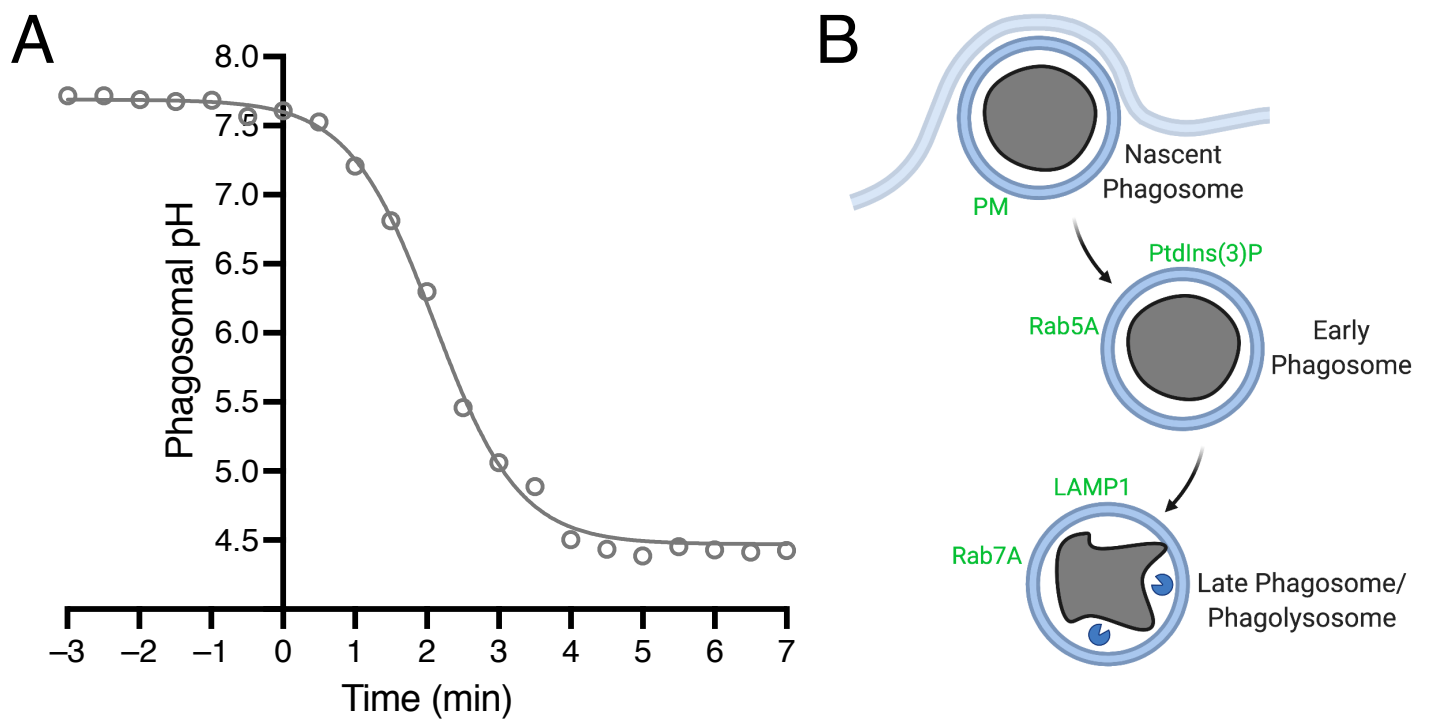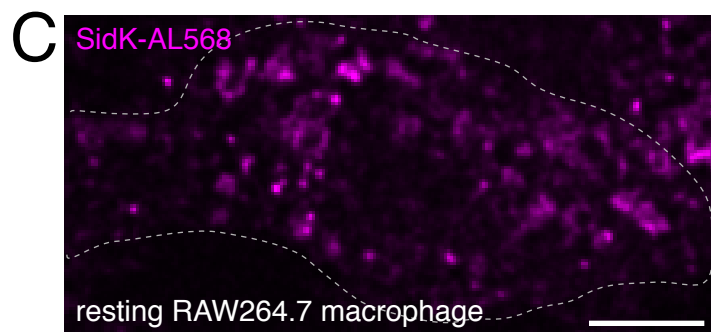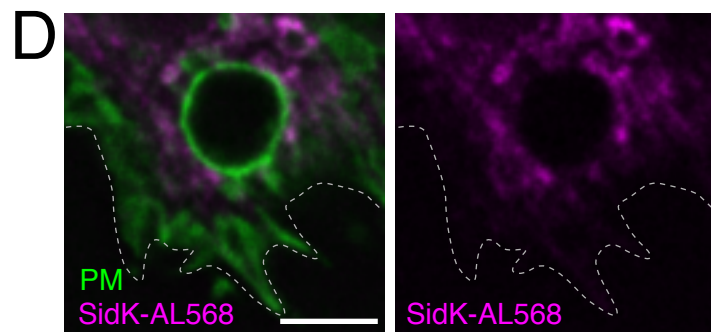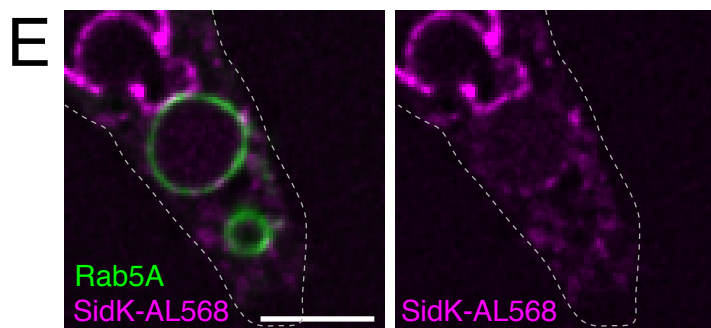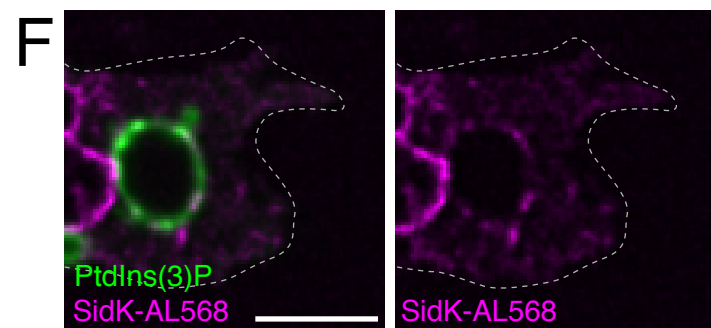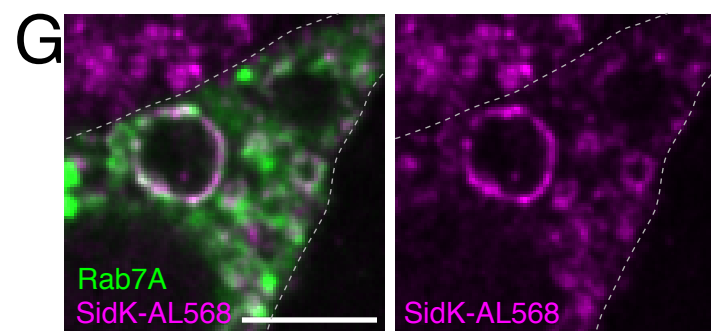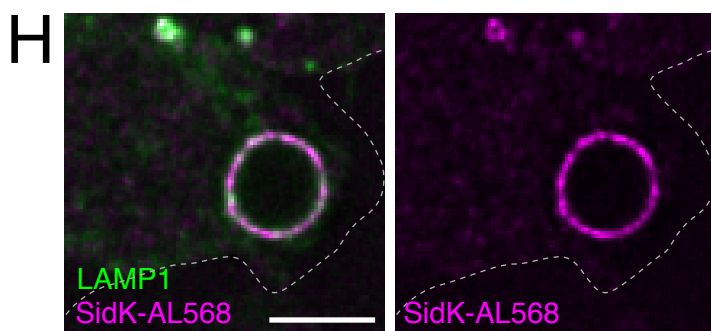



Figure 5

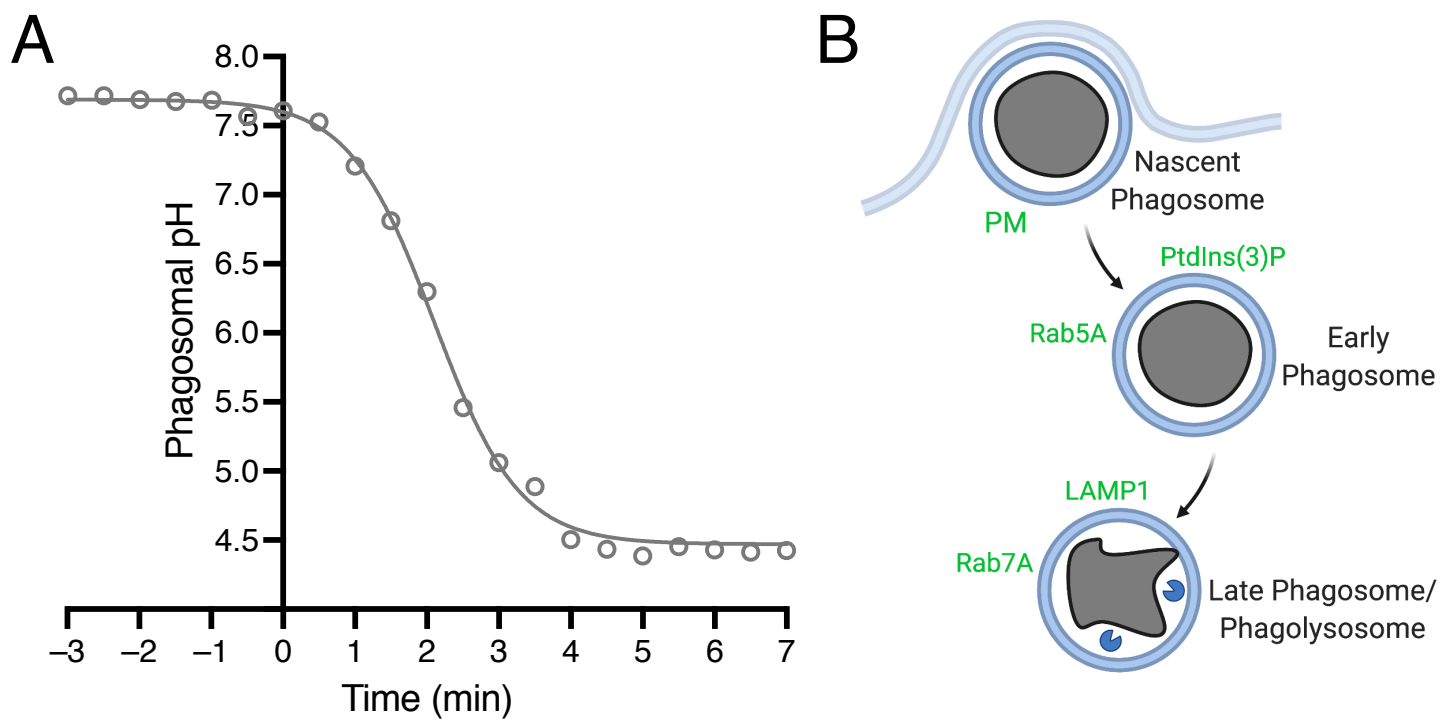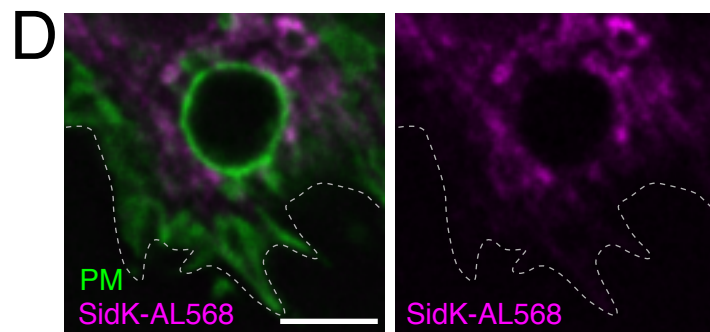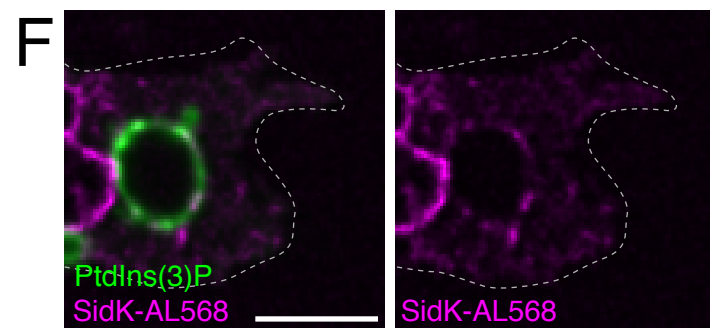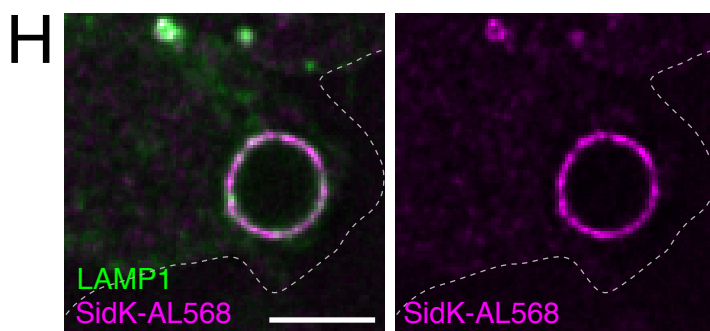

Figure 6

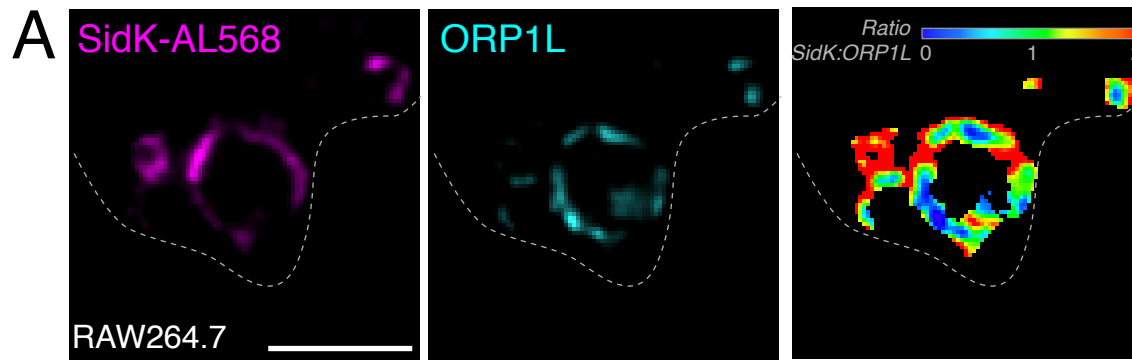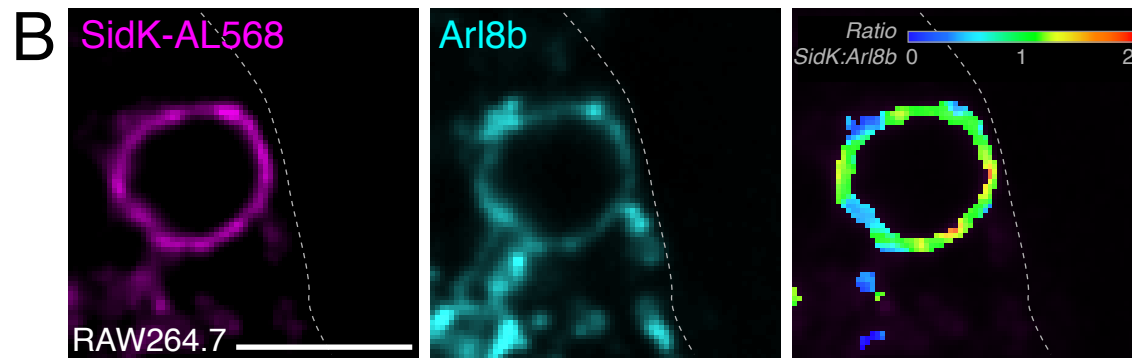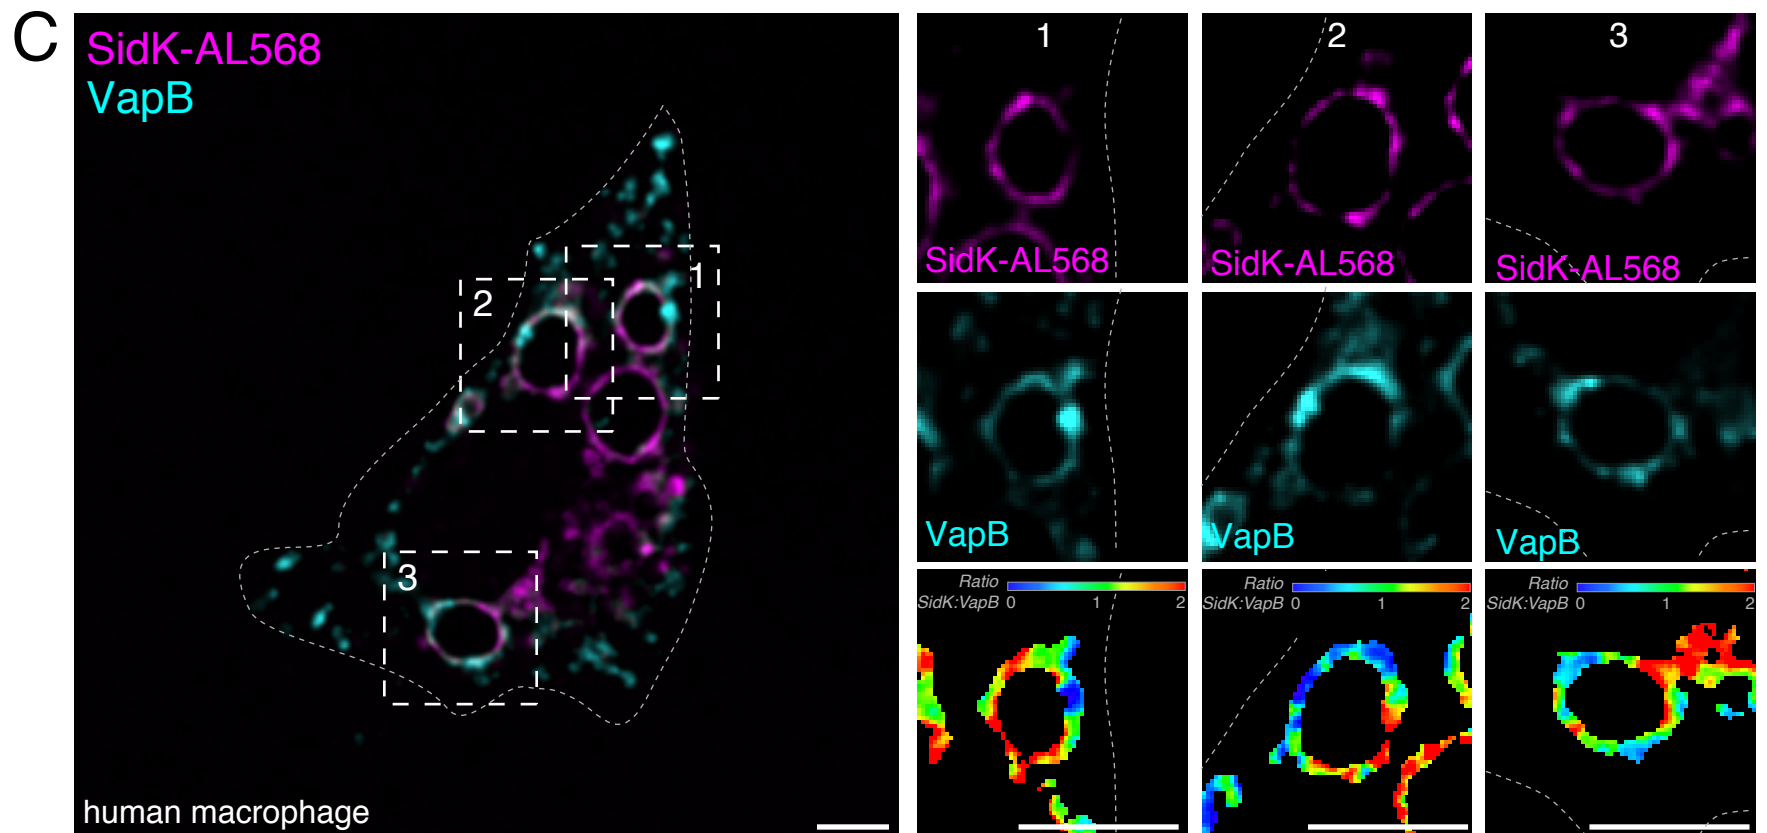

Figure 7

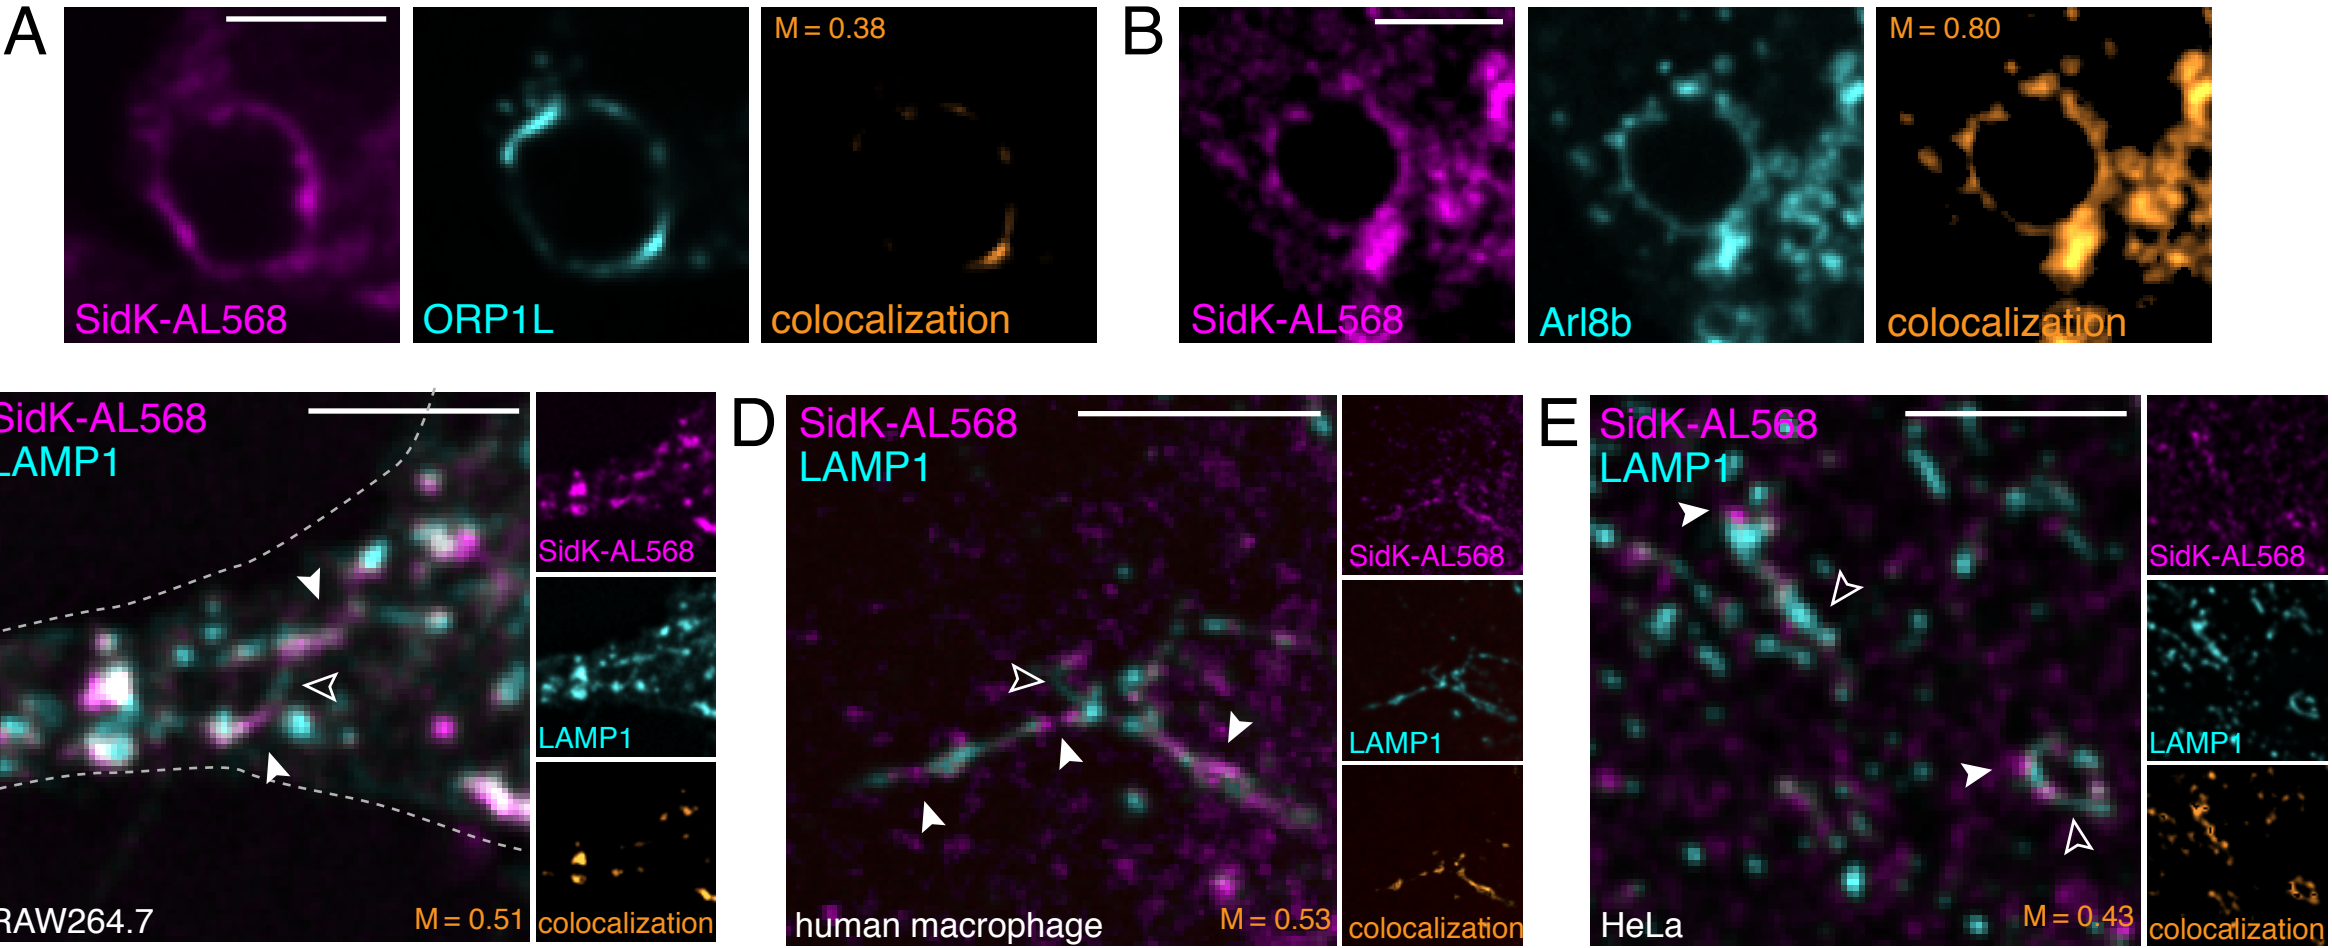

# Figure 8

bioRxiv preprint doi: <https://doi.org/10.1101/2021.07.29.454369>; this version posted July 30, 2021. The copyright holder for this preprint (which was not certified by peer review) is the author/funder, who has granted bioRxiv a license to display the preprint in perpetuity. It is made available under aCC-BY-NC-ND 4.0 International license.

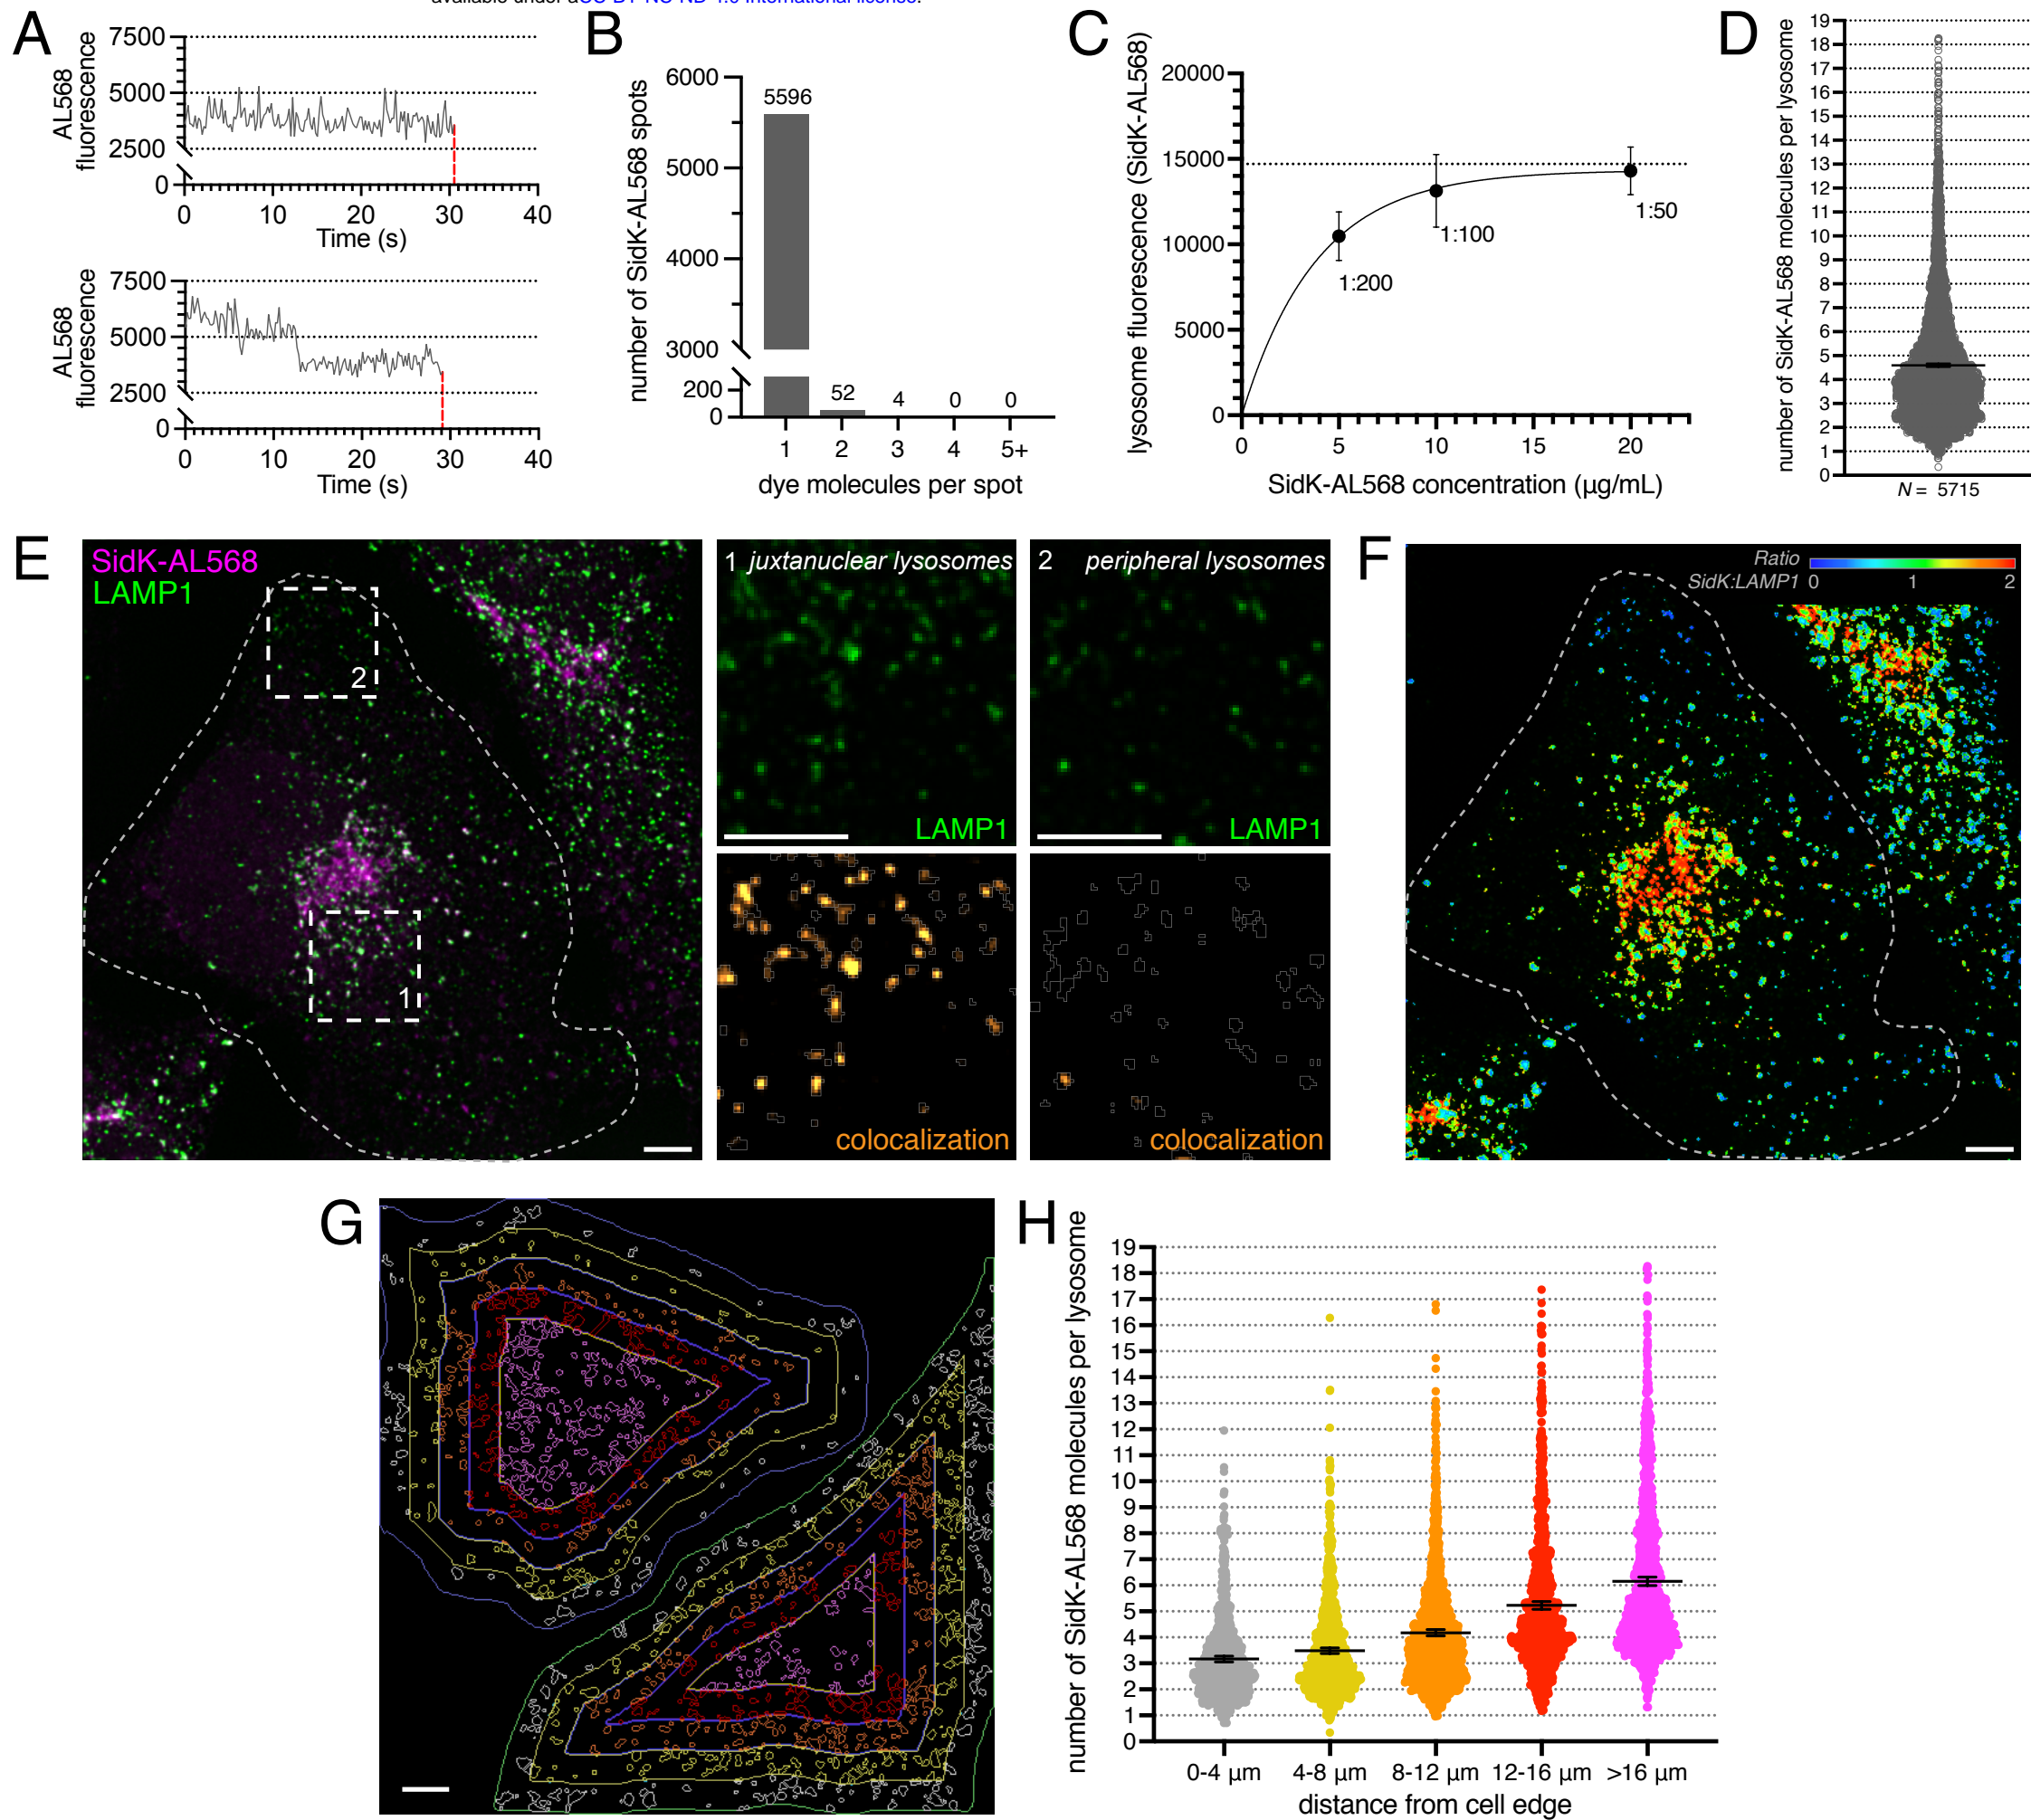

Figure S1

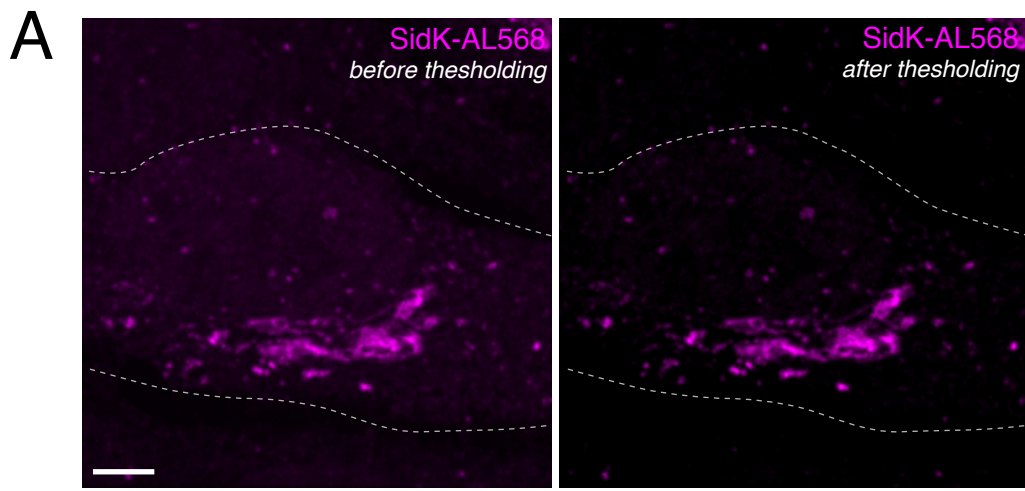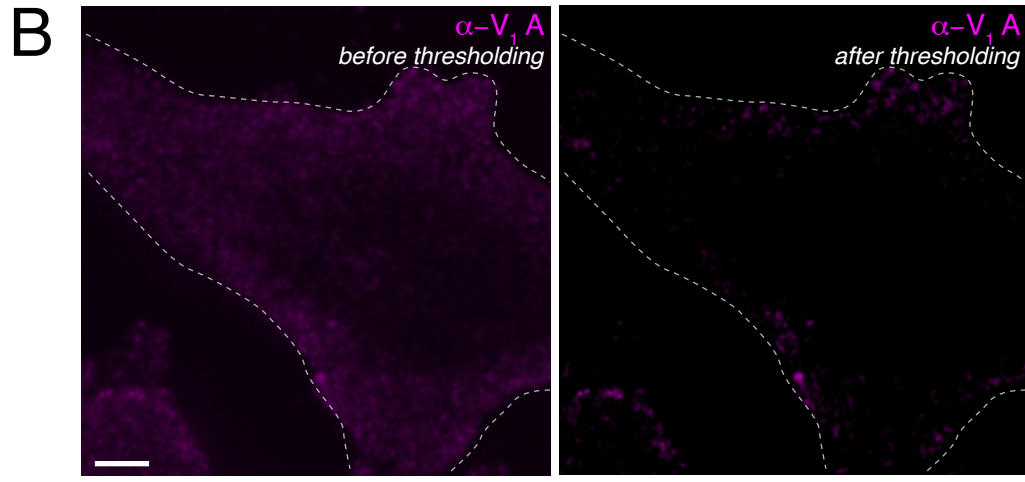

Source: http://biorxiv.org/content/10.1101/2021.07.29.454369v1.full.pdf
